1 Multi-modal investigation of the schizophrenia-associated 3q29 genomic interval reveals global  
2 genetic diversity with unique haplotypes and segments that increase the risk for non-allelic  
3 homologous recombination NAHR

4  
5 Feyza Yilmaz<sup>1,9</sup>, Umamaheswaran Gurusamy<sup>2,9</sup>, Trenell J. Mosley<sup>3</sup>, Yulia Mostovoy<sup>2</sup>, Tamim H.  
6 Shaikh<sup>4</sup>, Michael E. Zwick<sup>5</sup>, Pui-Yan Kwok<sup>2,6</sup>, Charles Lee<sup>1,7</sup>, Jennifer G. Mulle<sup>8,\*</sup>

7  
8 1 - The Jackson Laboratory for Genomic Medicine, Farmington, CT, USA

9 2 - Cardiovascular Research Institute and Institute for Human Genetics, UCSF School of  
10 Medicine, San Francisco, CA, USA

11 3 - Graduate Program in Genetics and Molecular Biology, Laney Graduate School, Emory  
12 University, 201 Dowman Drive, Atlanta, GA, 30322, USA

13 4 - Department of Pediatrics, Section of Genetics and Metabolism, University of Colorado  
14 School of Medicine, Aurora, CO, USA

15 5 - Department of Genetics, School of Arts and Sciences, Rutgers University, New Brunswick,  
16 NJ, USA

17 6 - Department of Dermatology, UCSF School of Medicine, San Francisco, CA, USA

18 7 - Precision Medicine Center, The First Affiliated Hospital of Xi'an Jiaotong University, 277  
19 West Yanta Road, Xi'an 710061, Shaanxi, People's Republic of China

20 8 - Department of Psychiatry, Robert Wood Johnson Medical School, Rutgers Biomedical and  
21 Health Sciences, Rutgers University, New Brunswick, NJ, USA

22  
23 <sup>9</sup>These authors contributed equally to this work

24 \*Corresponding author: [jm2618@cabm.rutgers.edu](mailto:jm2618@cabm.rutgers.edu)

25  
26  
27  
28  
29  
30  
31  
32  
33

## 34 **Abstract**

35 Chromosomal rearrangements that alter the copy number of dosage-sensitive genes can  
36 result in genomic disorders, such as the 3q29 deletion syndrome. At the 3q29 region, non-allelic  
37 homologous recombination (NAHR) between paralogous copies of segmental duplications  
38 (SDs) leads to a recurrent ~1.6 Mbp deletion or duplication, causing neurodevelopmental and  
39 psychiatric phenotypes. However, risk factors contributing to NAHR at this locus are not well  
40 understood. In this study, we used an optical mapping approach to identify structural variations  
41 within the 3q29 interval. We identified 18 novel haplotypes among 161 unaffected individuals  
42 and used this information to characterize this region in 18 probands with either the 3q29  
43 deletion or 3q29 duplication syndrome. A significant amount of variation in haplotype prevalence  
44 was observed between populations. Within probands, we narrowed down the breakpoints to a  
45 ~5 kbp segment within the SD blocks in 89% of the 3q29 deletion and duplication cases studied.  
46 Furthermore, all 3q29 deletion and duplication cases could be categorized into one of five  
47 distinct classes based on their breakpoints. Contrary to previous findings for other recurrent  
48 deletion and duplication loci, there was no evidence for inversions in either parent of the  
49 probands mediating the deletion or duplication seen in this syndrome.

50

## 51 Introduction

52 Genomic disorders account for a substantial fraction of physical, neurodevelopmental,  
53 and psychiatric morbidity<sup>1-3</sup>. Examples include deletions at the 7q11.23 region known as  
54 Williams–Beuren syndrome (WBS, [OMIM 194050](#)), deletions at the 22q11.2 locus that give rise  
55 to 22q11.2 deletion syndrome, ([OMIM 611867](#)), and reciprocal pathogenic deletions,  
56 duplications at the proximal 16p11.2 locus ([OMIM 611913](#) and [OMIM 614671](#)), and the 3q29  
57 deletion syndrome.<sup>4-9</sup> The 3q29 deletion syndrome ([OMIM 609425](#)) was first identified by  
58 Rossi and colleagues in 2001 as a cryptic subtelomeric deletion, and later Willatt and  
59 colleagues described an additional six individuals with similar 3q29 deletions<sup>7,10</sup>. In 2008,  
60 reciprocal 3q29 duplications were identified in 19 individuals when analyzing the genomes of  
61 14,698 individuals with idiopathic mental retardation using array comparative genomic  
62 hybridization (aCGH)<sup>11</sup>. The 3q29 deletion syndrome is associated with a >40-fold increased  
63 risk for schizophrenia, and patients are also predisposed to developmental delay, intellectual  
64 disability, autism spectrum disorder (ASD), anxiety disorders, attention-deficit/hyperactivity  
65 disorder (ADHD), congenital heart defects, and additional somatic, neurodevelopmental, and  
66 psychiatric phenotypes<sup>12-14</sup>. Similarly, phenotypes observed in individuals with the reciprocal  
67 3q29 duplication syndrome include developmental delay, speech delay, intellectual disability,  
68 ocular and cardiac anomalies, microcephaly, dental anomalies, obesity, seizures, and  
69 behavioral similarities to ASD<sup>11,14-23</sup>. The 3q29 deletion syndrome has an estimated population  
70 prevalence of 1:30,000<sup>24</sup>, and 3q29 duplication syndrome has a population prevalence of  
71 1:8,000-75,000<sup>14</sup>. Although most deletions are *de novo*, a small number of inherited deletions  
72 (7%) have been reported<sup>25</sup>.

73 The 3q29 deletion is typically *de novo*, yet most patients have the same ~1.6 Mbp region  
74 of chromosome 3 deleted. These observations suggest there are key risk structures flanking the  
75 3q29 interval that predispose to non-allelic homologous recombination (NAHR) and  
76 consequently, formation of the deletions and duplications. It has previously been noted that

77 complex regions of the human genome, such as the 3q29 region, can predispose individuals to  
78 recurrent deletions or duplications associated with genomic disorders<sup>26</sup>. Therefore,  
79 characterizing the fine structure of these regions among probands, their parents, and unaffected  
80 individuals can help us understand the etiology of the genomic disorder as well as whether  
81 certain haplotype configurations are at risk for increased frequency of the genomic disorder. In  
82 this study, our aim was to determine the fine structure of the 3q29 region in probands with 3q29  
83 deletion or 3q29 duplication syndromes and their parents. We used an optical mapping  
84 technique<sup>27,28</sup> to identify the haplotype structures and breakpoints in 16 probands with the 3q29  
85 deletion and two probands with the 3q29 duplication syndrome. Additionally, we applied the  
86 same approach to identify the haplotype structures in the 3q29 region among 161 unaffected  
87 individuals from the 1000 Genomes Project and the California Initiative to Advance Precision  
88 Medicine. The results from our study have important implications for the understanding of the  
89 molecular etiology of the 3q29 deletion and duplication syndromes.  
90

## 91 **Materials and Methods**

### 92 ***Sample collection - 1000 Genomes Project and California Initiative to Advance Precision***

#### 93 ***Medicine cohorts***

94           In this study, we analyzed a ~2 Mbp region on chromosome 3 (chr3:195,428,934-  
95 197,230,596; GRCh38), including three segmental duplication (SD) blocks, denoted as SDA,  
96 SDB, and SDC. The two SDs closest to the telomere (SDB and SDC) flank the canonical ~1.6  
97 Mbp interval deleted in 3q29 deletion syndrome. We investigated this region in 161 unaffected  
98 individuals from 26 diverse populations consisting of five super populations, Africans (AFR)  
99 (n=37), Americans (AMR) (n=52), East Asians (EAS) (n=22), Europeans (EUR) (n=27), and  
100 South Asians (SAS) (n=23), as part of the 1000 Genomes Project (1000GP) and California  
101 Initiative to Advance Precision Medicine (CIAPM) (Table S1). CIAPM samples were collected as  
102 described previously<sup>29</sup>. CIAPM samples and 114 unaffected individuals from 1000GP were  
103 designated as the University of California San Francisco (UCSF) dataset. Samples from two  
104 publicly available datasets, the Human Genome Structural Variation Consortium (HGSVC) and  
105 the Human Pangenome Reference Consortium (HPRC), were included in the analyses. HGSVC  
106 included Bionano Genomics optical mapping data of three 1000GP samples (HG01573,  
107 HG02018, and GM19036), which were previously not studied (TableS1, Web Sources). 44  
108 unaffected individuals from 1000GP had optical mapping data and phased assemblies available  
109 through HPRC, two of which (HG00733 and NA19240) were shared between HGSVC and  
110 HPRC (Table S1, Web Sources). Additionally, our dataset included optical mapping data of 114  
111 samples that were part of the 1000GP and the CIAPM, three of which (HG00513, HG00732,  
112 and NA19239) were shared with HGSVC and not included (Table S1). Cell lines of these  
113 additional 1000GP samples were obtained from Coriell and grown in RPMI 1640 media with  
114 15% FBS, supplemented with L-glutamine and penicillin/streptomycin, at 37°C and 5% CO<sub>2</sub>.

115

#### 116 ***Sample collection - The 3q29 Project samples***



117 Subjects were recruited from the 3q29 Project registry<sup>12</sup> (3q29deletion.org) as  
118 previously described<sup>30</sup>. Inclusion criteria were a validated clinical diagnosis of 3q29 deletion  
119 syndrome where the subject's deletion overlapped the canonical region (chr3:195,725,000–  
120 197,350,000; GRCH37) by  $\geq 80\%$ , and willingness and ability to travel to Atlanta, Georgia.  
121 Exclusion criteria were any 3q29 deletion with less than 80% overlap with the canonical region  
122 and nonfluency in English. 3q29 study subjects underwent deep phenotyping according to an  
123 established protocol<sup>30</sup>. Whole blood drawn at the study visit was used for downstream optical  
124 mapping analysis. Optical mapping analysis was completed for 16 probands and parental  
125 genomes were analyzed when available. For 10 probands, both biological parents were  
126 available for analysis (deletions were confirmed to be *de novo*). Four probands had one parent  
127 available for analysis; two probands were singletons (Table S2). Two additional probands with  
128 the 3q29 duplication syndrome were also included in the present study; the same protocol was  
129 followed for optical mapping analysis. All subjects had genotyping arrays completed for parent-  
130 of-origin analysis<sup>31</sup>.

### 131 **High-molecular-weight DNA extraction**

133 Ultra-high-molecular-weight DNA was extracted from cell lines of 1000GP and CIAPM  
134 samples (n=114), and from whole blood samples from the 3q29 Project (n=46) according to the  
135 Bionano Prep SP Fresh Cells DNA Isolation protocol, revision C (Document #30257), using a  
136 Bionano SP Blood & Cell DNA Isolation Kit (catalog #80030). In short, 1.5 million cells were  
137 centrifuged and resuspended in a solution containing detergents, proteinase K, and RNase A.  
138 DNA was bound to a silica disk, washed, eluted, and homogenized via 1- hour end-over-end  
139 rotation at 15 rpm, followed by an overnight rest at room temperature. Isolated DNA was  
140 fluorescently tagged at motif CTTAAG by the enzyme DLE-1 and counter-stained using a  
141 Bionano Prep™ DNA Labeling Kit – Direct Label and Stain (catalog #8005) according to the  
142 Bionano Prep DLS Protocol, revision F (Document #30206). A total of 750 ng of purified

143 genomic DNA was labeled by incubating with DL-Green dye and DLE-1 Enzyme in DLE-1  
144 Buffer for 2 hours at 37°C, followed by heat inactivation of the enzyme for 20 minutes at 70°C.  
145 The labeled DNA was treated with Proteinase K at 50°C for 1 hour, and excess DL-Green dye  
146 was removed by membrane adsorption. The DNA was stored at 4°C overnight to facilitate DNA  
147 homogenization and then quantified using a Qubit dsDNA HS Assay Kit (Molecular Probes/Life  
148 Technologies). The labeled DNA was stained with an intercalating dye and left to stand at room  
149 temperature for at least 2 hours before loading onto a Bionano Chip. The DNA was loaded onto  
150 the Bionano Genomics Saphyr Chip and linearized and visualized by the Saphyr systems. Data  
151 collection was performed using Saphyr 2nd generation instruments (Part #60325) and  
152 Instrument Control Software (ICS) version 4.9.19316.1. The DNA backbone length and  
153 locations of fluorescent labels along each molecule were detected using the Saphyr system  
154 software.

155

### 156 ***De novo assembly of optical genome maps***

157 Single-molecule genome maps of 1000GP, CIAPM, and The 3q29 Project samples were  
158 assembled *de novo* into genome maps using the assembly pipeline Bionano Solve v3.5,  
159 developed by Bionano Genomics with default settings<sup>32</sup> as described previously<sup>33</sup>. In short, a  
160 pairwise comparison of DNA molecules (min 250 kbp) was generated to produce the initial  
161 consensus genome maps. During an extension step, molecules were aligned to genome maps,  
162 and maps were extended based on the molecules aligning past the map ends. Overlapping  
163 genome maps were then merged. Extension and merge steps were repeated five times before a  
164 final refinement of the genome maps. Clusters of molecules aligned to genome maps with  
165 unaligned ends >30 kbp in the extension step were re-assembled to identify all alleles. To  
166 identify alternate alleles with smaller size differences from the assembled allele, clusters of  
167 molecules aligned to genome maps were detected with internal alignment gaps of size <50 kbp,

168 in which case the genome maps were converted into two haplotype maps. The final genome  
169 maps were aligned to the reference genome GRCh38.

170

### 171 ***Single-molecule analysis pipeline for optical genome maps***

172 In the 3q29 SD blocks, SDA, SDB, and SDC, we defined segments according to  
173 characteristic banding patterns of Bionano Genomics optical mapping labels. We color-coded  
174 these segments and displayed them according to assigned colors. The order of the segments  
175 are: SDA-26 kbp (magenta), SDA-5kbp (blue), SDA-11 kbp (yellow), SDA-4 kbp (red), ~33 kbp  
176 (maroon, SDA and unique region), ~15 kbp (orange, unique region), ~124 kbp (green, unique  
177 region), SDB-5kbp 1st copy (blue), SDB-15kbp (magenta partial copy), SDB-4 kbp (red), SDB-  
178 11kbp (yellow), SDB-5kbp 2nd copy (blue), SDC-11 kbp (yellow), SDC-5 kbp (blue), and SDC-  
179 15 kbp (magenta partial copy) (Table S3). Structural variations and haplotypes at the 3q29 locus  
180 were analyzed and single molecules were evaluated in 161 unaffected individuals from 26  
181 diverse populations from the 1000GP and CIAPM, and 46 samples from the 3q29 Project using  
182 the Optical Maps to Genotype Structural Variation (OMGenSV) package as described  
183 previously<sup>34,35</sup>. To identify 3q29 haplotypes in samples from 114 unaffected individuals which  
184 were part of 1000GP and CIAPM, the assembled contigs were visualized using the “anchor”  
185 mode in OMView from the OMTools package<sup>36</sup>, and Bionano Access was used for HGSVC  
186 (n=3), HPRC (n=44), and the 3q29 Project (n=46) samples. Haplotypes were manually identified  
187 from these visualizations, and corresponding consensus map (cmap) files were constructed for  
188 each haplotype if the contig in the 3q29 region was not contiguous, including at least 500 kbp of  
189 the unique flanking region where applicable. When 3q29 SDs contained multiple SVs and were  
190 too long to analyze from end to end with single molecules (>350 kbp), molecules were  
191 subdivided into groups that were anchored in the proximal or distal unique regions of 3q29 SDA  
192 and SDB. For each haplotype, the corresponding cmaps were compiled into a single file and  
193 used as a reference input file for the OMGenSV pipeline, along with local molecules from each

194 sample and a set of "critical regions" (SDA:195,578,485-195,817,578 Mbp; SDB:195,804,017-  
195 196,073,500 Mbp; SDC:197,557,633-197,743,251 Mbp; GRCh38) defining the areas on each  
196 cmap that molecules need to span to support the presence of that haplotype in the sample. The  
197 3q29 Project sample cohort haplotypes were identified by using 1000GP and CIAPM individuals'  
198 3q29 haplotype maps as a reference, and molecule support was confirmed by following the  
199 steps described above. Images of molecule support were obtained by using OMTools and  
200 Bionano Access (Data and Code Availability). Fisher's exact test was used to test the  
201 significance of the 3q29 haplotypes in R Studio (version 1.4.1717). 100,000 replicates were  
202 used for the Monte Carlo test. The expected value for each haplotype was calculated by the  
203 following command:

```
204 tab.exp <- round(chisq.test(data)$expected)
```

205 Then we used expected values for Fisher's exact test:

```
206 fisher.test(data, simul=T, B =100000)$p.value
```

207 Association plots were generated with the following command:

```
208 tab.sel <- as.matrix(data[freq$Total >5,])
```

```
209 assocplot(tab.sel, col=c("red", "green"))
```

210 Finally, we annotated all haplotypes detected in our study with GENCODE v37 to identify  
211 overlapping genomic elements, including protein-coding genes and noncoding RNAs.

212

### 213 ***Breakpoint mapping and trio analysis of the 3q29 Project samples***

214 For each proband (n=18, 16 probands with the 3q29 deletion and two probands with the  
215 3q29 duplication syndrome), *de novo* assembled contigs were aligned to the GRCh38 human  
216 genome reference assembly, and the 3q29 region was manually inspected to identify deletion  
217 and duplication breakpoints. Once identified, the underlying single molecules were examined to  
218 verify that deletion and duplication breakpoints were well supported by single molecules (n ≥ 3  
219 molecules). Then, the sequence identity of approximate breakpoints and the corresponding

220 sequence in GRCh38 was determined by the NCBI *blastn* tool (BLASTN 2.9.0+) with the  
221 following command:

```
222 blastn -query $file1 -subject $file2 -num_alignments 5 -  
223 num_descriptions 5 -out $alignmentoutputfile
```

224 Only “the best alignment” was included in the final output file. Haplotypes of the parents were  
225 identified as described above. Finally, the parents transmitting the intact chromosome and  
226 deletion parent of origin were identified by visual pairwise comparison of the haplotypes using  
227 Bionano Access.

228

### 229 ***Validation using orthogonal data***

230 Publicly available optical mapping data and phased assemblies of 44 unaffected  
231 individuals as part of the 1000GP from the HPRC were analyzed to confirm the 3q29 haplotypes  
232 which were identified by using Bionano Genomics optical mapping data. First, HPRC phased  
233 assembly fasta files were converted to *in silico* maps and haplotypes were detected as  
234 described above. Then a visual pairwise comparison of optical mapping and phased assembly  
235 3q29 haplotypes for each sample was performed by using Bionano Access (Figure S1-S4). All  
236 HPRC phased assemblies (n=44) except the paternal haplotype of HG01928 supported the  
237 haplotypes identified in optical mapping data (Figure S5).

238

## 239 **Results**

240           The 3q29 region contains three segmental duplication (SD) blocks within a ~2 Mbp  
241 region, SDA (~73 kbp), SDB (~64 kbp), and SDC (~41 kbp) (GRCh38) (Figure 1, Table S3).  
242 Colored arrows depicting the 3q29 segments and their orientations were determined based on  
243 the labeling pattern from the optical mapping data and the sequence identity between 3q29 SDs  
244 (Table S4) as described in the Materials and Methods. In the GRCh38 human genome  
245 reference assembly we identified three copies of ~26 kbp segment (magenta), four copies of ~5  
246 kbp (blue), three copies of ~11 kbp (yellow), two copies of ~4 kbp (red), one copy of ~33 kbp  
247 (maroon), one copy of ~15 kbp (orange), and one copy of ~124 kbp (green) segments (Figure  
248 1B).

249

### 250 ***3q29 haplotypes in unaffected individuals from 1000GP and CIAPM***

251           In this study, we used *de novo* assembled optical genome maps having an average  
252 effective coverage of 102.4 X and an average N50 of 301.96 kbp. We identified a total of 36  
253 different haplotypes for the 3q29 region (195,605,705 - 197,706,750; GRCh38) among 161  
254 individuals from the 1000GP and CIAPM cohort. Within the SDC region, no variation was  
255 observed across samples. Therefore, all haplotypes were based on the variation observed  
256 between SDA and SDB. These 161 individuals were from 26 diverse populations representing  
257 five super populations: AFR, AMR, EAS, EUR, and SAS (Table S2). The haplotype size of the  
258 3q29 region ranged from ~287 kbp (H28, HG03863-SAS) to 859 kbp (H24, BC02901-AMR, and  
259 BC03702-EUR) (Figure 1, Table S5). The smallest haplotype, H28, is missing the proximal  
260 ~440 kbp and the distal ~132.5 kbp of the largest haplotype H24 and lacks five copies of the  
261 following segments: ~26 kbp, ~5 kbp, ~11 kb, and ~33 kbp (Figure S6). Of 18 previously  
262 described haplotypes, we identified 13 haplotypes in our samples; H10, H11, H12, H14, and  
263 H18 from Ebert and colleagues<sup>33</sup> were not observed. We detected 18 novel haplotypes, H19-  
264 H36. The most common three haplotypes among all 161 unaffected individuals were H3

265 (14.91%), H1 (14.29%), and H2 (12.42%). The H3 haplotype (14.91%) represents the GRCh38  
266 human genome reference assembly haplotype for the 3q29 region, and the H2 (12.42%)  
267 haplotype was described in the most recent human genome assembly as part of the Telomere-  
268 to-Telomere (T2T) Consortium <sup>37</sup>. We also detected 14 haplotypes that were each observed  
269 once among all 161 genomes (i.e., 322 chromosomes) examined and therefore referred to as  
270 “singletons”. To assess the accuracy of the haplotypes identified by optical mapping data, we  
271 overlaid long-read sequencing-based phased assemblies (HPRC dataset, n=44 (Table S5)) to  
272 the optical mapping-based haplotypes. 20 haplotypes (11 previously identified and 9 novel)  
273 assessed in this manner were confirmed by long-read phased assemblies. One discrepancy  
274 was detected between the optical mapping and phased assembly haplotype structures, for one  
275 chromosome from sample HG01928. The phased assembly suggested that haplotypes were  
276 H1/H5, and the optical mapping data suggested that haplotypes were H4/H5. Single DNA  
277 molecules (>10) from the optical mapping data were anchored to the proximal and distal unique  
278 region and span at least 90% of the 3q29 region and confirmed the presence of the H4  
279 haplotype in HG01928 (Figure S5). Our data suggest that the phased assembly for this  
280 individual may have been incorrectly assembled.  
281



It is made available under a [CC-BY-NC-ND 4.0 International license](https://creativecommons.org/licenses/by-nc-nd/4.0/).

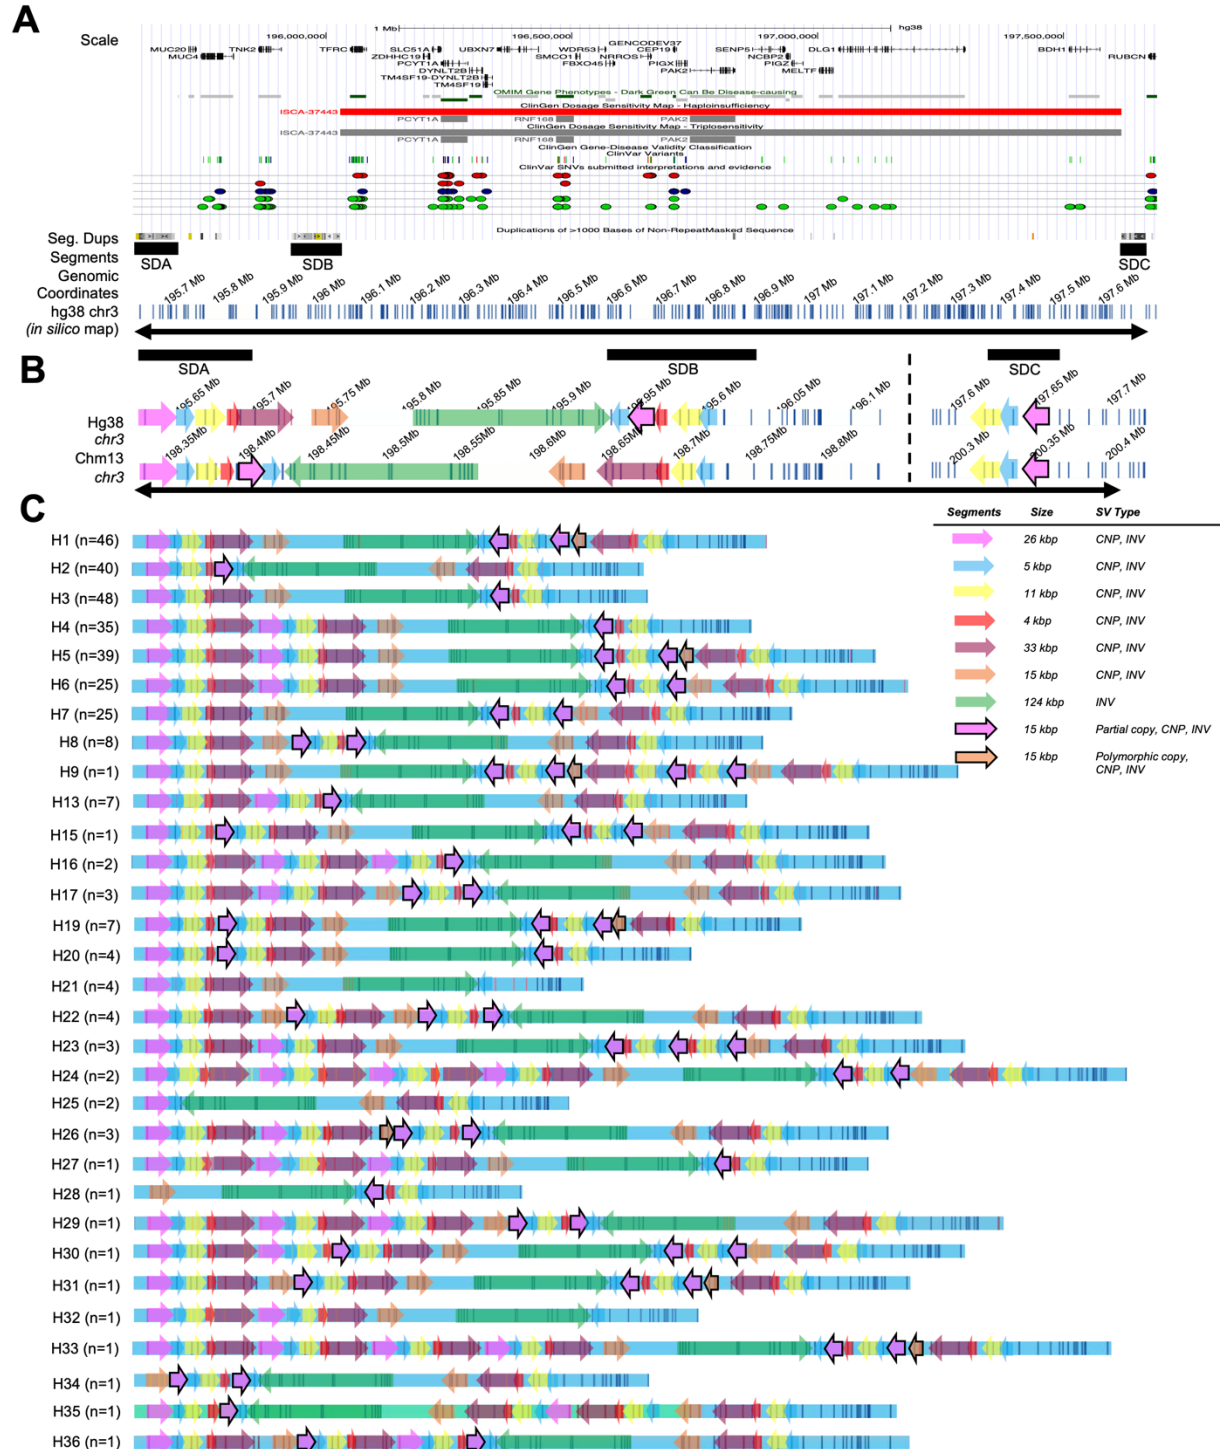

**Figure 1: The segment structure of GRCh38 3q29 region and 3q29 haplotypes identified in this study.**

(A) 3q29 genomic locus with SDA, SDB, SDC, OMIM Gene Phenotypes, ClinGen Dosage Sensitivity Map - Haploinsufficiency, ClinGen Dosage Sensitivity Map - Triplosensitivity, ClinGen Gene-Disease Validity Classification, ClinVar Variants, ClinVar SNVs, and Duplications of > 1000 Bases of Non-RepeatMasked Sequence represented as Tracks. The 3q29 GRCh38 *in silico* map is represented as the last track. (B) 3q29 segments of GRCh38 and T2T/chm13 with SDA, SDB, and SDC represented as black boxes on top and genomic segments as colored arrows overlaid on the *in silico* maps (white background with vertical blue lines). Dotted line: the unique region between SDB and SDC, 196.1-197.6Mbp. (C) The structure and prevalence of 13 previously reported and identified among our samples (H1-H9, H13, H15-H17) and 18 novel 3q29 haplotypes (H19-H36) of 3q29 SDA and SDB. Black arrows in panels A and B represent the region included in the analyses. Novel haplotypes were ordered by prevalence in the population. Each colored arrow, magenta, blue, yellow, maroon, orange, green, represents 3q29 segments. CNP: copy number polymorphism, INV: inversion.

282  
283  
284  
285  
286  
287  
288  
289  
290  
291  
292  
293

294  
295           We found significant differences in haplotype frequency between populations (Figure 2,  
296 *p-value = 0.000001 Fisher's exact test*). One of the most common haplotypes, H3, was  
297 observed at  $\geq 7\%$  frequency ( $\geq 14\%$  in four populations) in all five super populations (Figure  
298 2A). In the AFR population, three haplotypes account for 48% of the haplotype pool: H2 (22%),  
299 which was significantly enriched compared to other haplotypes and all other populations (*p-*  
300 *value = 0.009, Fisher's exact test*), H3 (15%), and H8 (11%) (Figure 2B). Interestingly, the H8  
301 haplotype, which contains the second-largest inversion observed in the 3q29 region (~289 kbp),  
302 was observed only in the AFR population (Figure 2B, *p-value = 5.73972e-06, Fisher's exact*  
303 *test*). Similarly, H19 haplotype was enriched in the AFR population (*p-value = 5.73972e-06,*  
304 *Fisher's exact test*) Furthermore, the H5 haplotype was enriched in the EAS population (41%, *p-*  
305 *value = 7.731026e-08, Fisher's exact test* compared to other haplotypes and all other  
306 populations). The H6 haplotype was enriched in the EUR population (19%, *p-value = 0.0002,*  
307 *Fisher's exact test* compared to all other populations and haplotypes). The H1 haplotype was  
308 enriched in the SAS population (26%, *p-value = 0.002, compared to other haplotypes and all*  
309 *other populations based on the Fisher's exact test*). The SVs differ from one haplotype to the  
310 other, often overlapping protein-coding genes (e.g., *MUC4* and *MUC20*), pseudogenes (e.g.,  
311 *SDHAP1* and *SDHAP2*), and lincRNAs (e.g., lincRNA MUC20-OT1).  
312

It is made available under a [CC-BY-NC-ND 4.0 International license](https://creativecommons.org/licenses/by-nc-nd/4.0/).

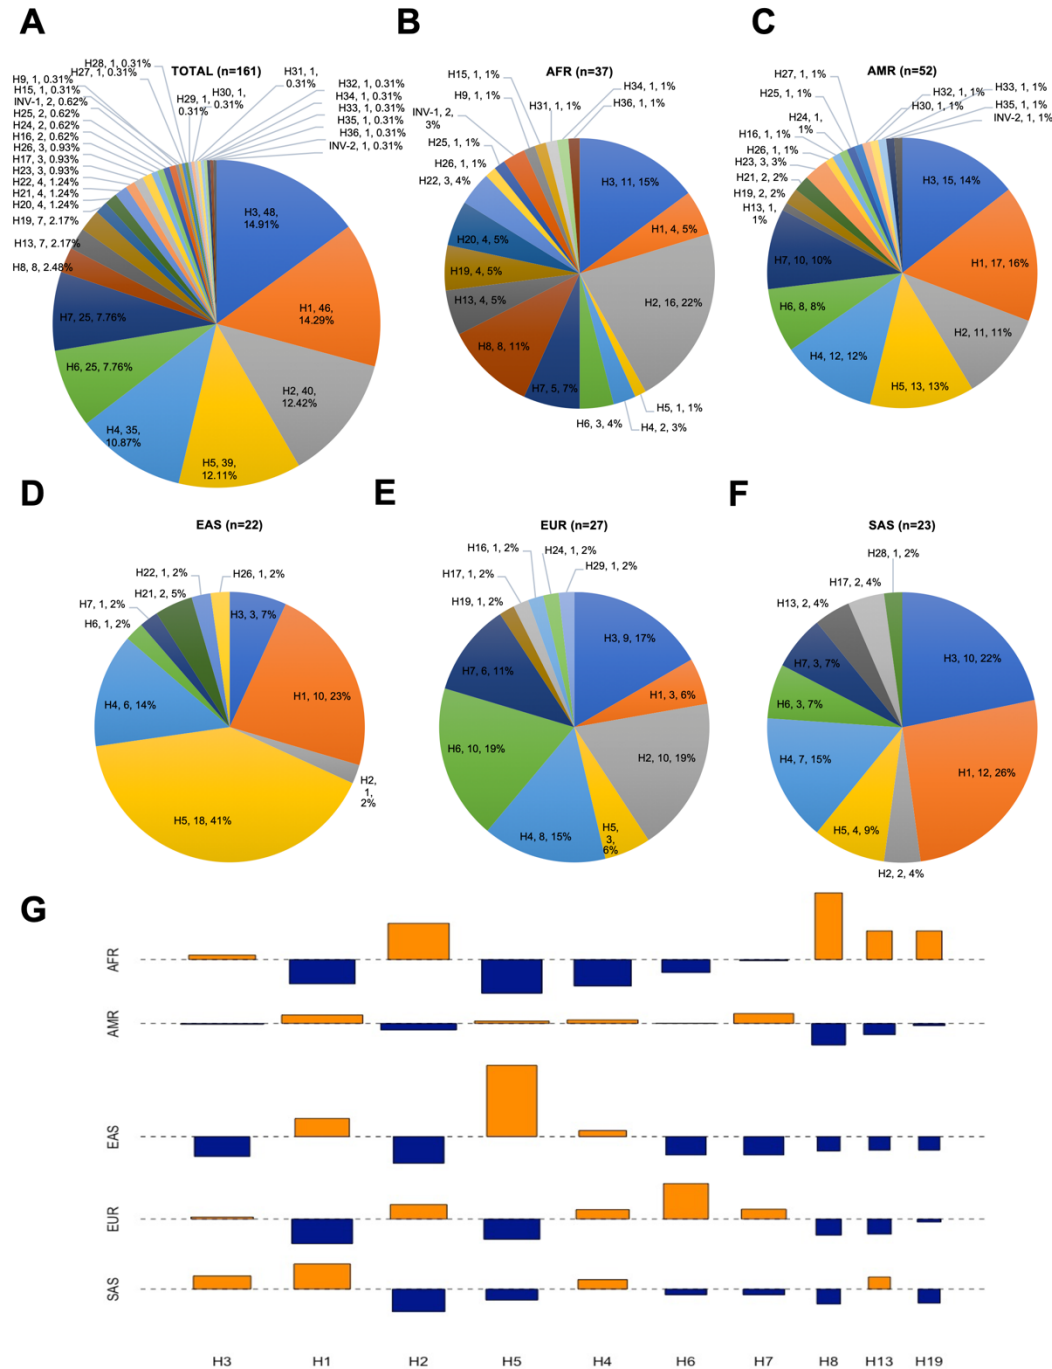

313  
 314 **Figure 2: Prevalence of the 3q29 haplotypes represented in five major populations.** We identified 3q29 haplotypes in each  
 315 sample and then calculated the prevalence of 3q29 haplotypes in five major populations. (A) The distribution of haplotypes identified  
 316 in total. (B) the distribution of haplotypes in the AFR population, (C) the distribution of haplotypes in the AMR population. (D) the  
 317 distribution of haplotypes in the EAS population. (E) the distribution of haplotypes in the EUR population,  
 318 (F) The distribution of haplotypes in the SAS population. AFR - African, AMR - American, EAS - East Asian, EUR - European, SAS -  
 319 South Asian. Each color in the pie charts represents a distinct 3q29 haplotype. The order in the labels in pie charts represents  
 320 haplotype ID, count, prevalence. Singleton haplotypes are H9, H15, H27-H36, and INV-2. n represents the number of samples.  
 321 (G) - Cohen-Friendly association plot depicting the relationship between haplotypes and populations. Each cell has a rectangle with  
 322 height proportional to the difference between observed and expected (normalized to expected) and width proportional to the square  
 323 root of expected counts so that the area of the rectangle is proportional to the difference in observed and expected counts. Expected  
 324 values were calculated as described in the Materials and Methods. If the observed count is greater than expected, the rectangle  
 325 rises above the baseline and is colored in red.  
 326

### 327 ***Inversions among the 3q29 haplotypes***

328           Among the 36 haplotypes identified from unaffected samples, we detected three different  
329 types of inversions that were > 100 kbp in size: two large inversions (~ 2.03 Mbp and ~2.13  
330 Mbp) between SDA and SDC, and a smaller inversion (~289 kbp) between SDA and SDB which  
331 was observed on twelve distinct haplotypes (Figure 3, Figure S3). Additionally, we observed  
332 inversions of each 3q29 segment in distinct haplotypes. The most prevalent inversion was a  
333 ~289 kbp inversion which was observed at a frequency > 10% in all five super populations on  
334 the following haplotypes: H2, H8, H13, H16, H17, H22, H25, H26, H29, H34, H35, and H36  
335 (Figure 3A, Figure S7). This previously reported inversion lies in a unique region between the  
336 3q29 SDA and SDB blocks and was observed in seven novel and five previously identified  
337 haplotypes in 69 unaffected individuals (76 chromosomes, Figure S3, Table S6)<sup>38,39</sup>. The two  
338 larger >2 Mbp inversions between 3q29 SDA and SDC (Figure 3, Figure S8) were identified  
339 among three unaffected individuals. The ~2.13 Mbp inversion (INV-1) (Figure 3B) was observed  
340 in HG03470-AFR and potentially arose on haplotype H8, and the ~2.03 Mbp inversion (INV-2)  
341 (Figure 3C) was observed in two individuals, GM19984-AFR and BC04902-AMR, and  
342 potentially arose on H20 haplotype. The ~2.03 Mbp and ~2.13 Mbp inversions are similar to the  
343 ~2 Mbp inversion described previously by Antonacci and colleagues (Figure 3D)<sup>40</sup>. However,  
344 the breakpoints of the ~2 Mbp inversion were localized to a 15.5 kbp region (chr3:196,868,578 –  
345 196,884,133 and chr3:198,832,975 – 198,848,521; hg17/UCSC 2004), and a more precise  
346 definition was not provided because the proximal breakpoint overlapped with an assembly gap  
347 in the hg17/UCSC 2004 human genome reference assembly. In this study, we have found that  
348 breakpoints for all inversions clustered to a ~5 kbp (blue) paralogous SD copies within SDA and  
349 SDC. These paralogous copies share ~98% sequence identity which suggests that NAHR is the  
350 mechanism causing these inversions.

351

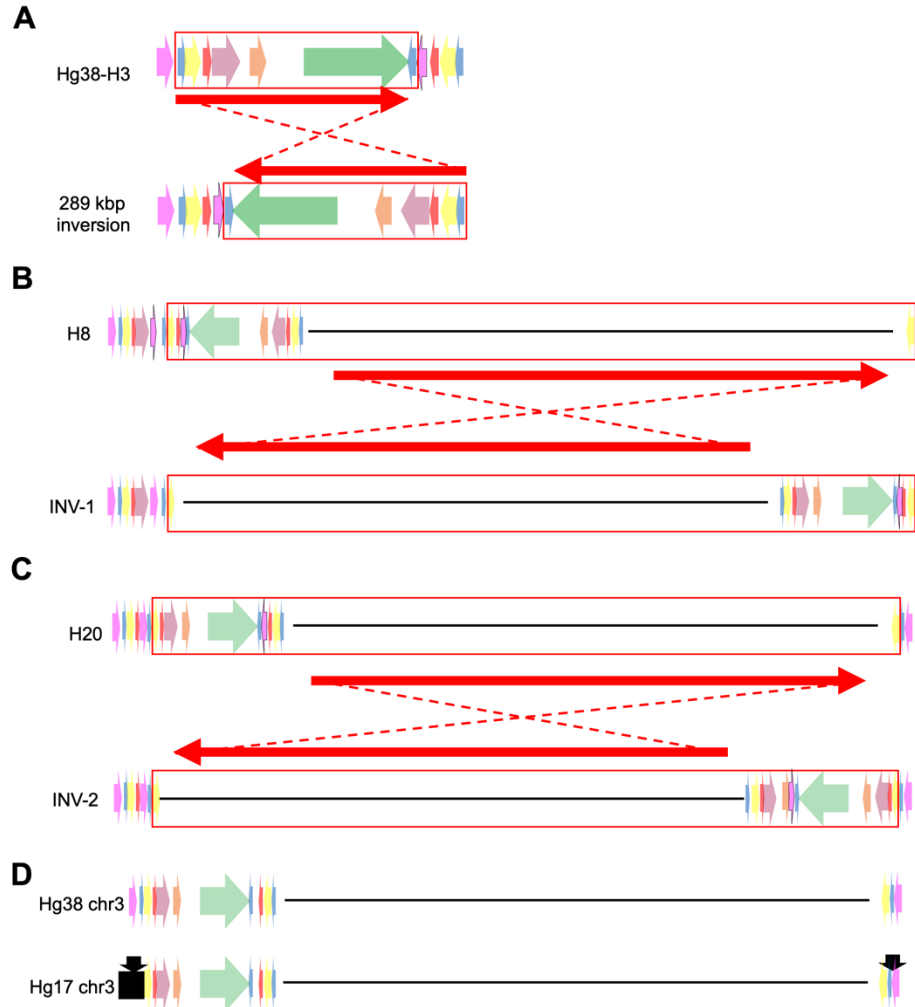

352  
353  
354  
355  
356  
357  
358  
359  
360  
361

**Figure 3: Inversions > 100 kbp identified from the 1000GP and CIAPM samples.**

(A) Hg38/GRCh38 human genome reference assembly presented at the top and the 289 kbp inversion, including the 5, 11, 4, 33, 15, and 124 kbp segments, represented at the bottom. (B) - Upper rectangle represents the H8 haplotype of the 3q29 region. The rectangle at the bottom represents the structure of INV-1. (C) - Upper rectangle represents the H20 haplotype of the 3q29 region. The rectangle at the bottom represents the structure of INV-2. (D) - Representation of Hg38/GRCh38 and Hg17/NCBI35 reference assemblies. Black arrows in Hg17/NCBI35 represent inversion breakpoints identified by Antonacci and colleagues. Colored arrows in each panel represent 3q29 segments, red rectangles indicate the region involved in the inversion, red arrows represent the orientation of the region before and after the inversion and dashed lines show the inversion.

### 362 **3q29 probands and parental haplotypes**

363 3q29 deletion syndrome is associated with a >40-fold increased risk for schizophrenia  
364 and can also be associated with neurodevelopmental disorders. Therefore, characterizing the  
365 fine structure of the 3q29 region in probands and their parents is critical to gain a better  
366 understanding of disease etiology. In this study, we analyzed 16 probands with the 3q29  
367 deletion and two probands with the 3q29 duplication syndrome from the 3q29 Project using

368 Bionano Genomics optical mapping technology (Figure 4A). The average effective coverage of  
369 assembly was 102.4 X and the average molecule N50 was 301.96 kbp (Table S2). The  
370 recurrent ~1.6 Mbp deletion in the 3q29 deletion syndrome probands results from one break in  
371 SDB and one break in SDC <sup>7,10,11</sup>. The unique genomic sequence residing between SDA and  
372 SDB is typically intact, not deleted, in the 3q29 deletion syndrome probands. We detected the  
373 recurrent ~1.6 Mbp deletion in 15 probands. In one proband we detected a smaller ~1.2 Mbp  
374 deletion lying completely within the ~1.6 Mbp 3q29 deletion region (Figure 4A, Family 18). This  
375 smaller deletion contains 19 of the 21 genes completely within its breakpoints. The centromeric  
376 breakpoint falls within the *TFRC* gene, deleting the promoter and the first four exons. On the  
377 telomeric side, the *BDH1* gene is intact. There is no discernible difference in phenotypic severity  
378 in this proband, despite their smaller deletion. None of the 15 deletions (~1.6 Mbp (n=14) and  
379 ~1.2 Mbp (n=1)) were seen in either of the parents and were therefore considered to be *de novo*  
380 events. One proband inherited the deletion (~1.6 Mbp) from his father (Family 20).



It is made available under a [CC-BY-NC-ND 4.0 International license](https://creativecommons.org/licenses/by-nc-nd/4.0/).

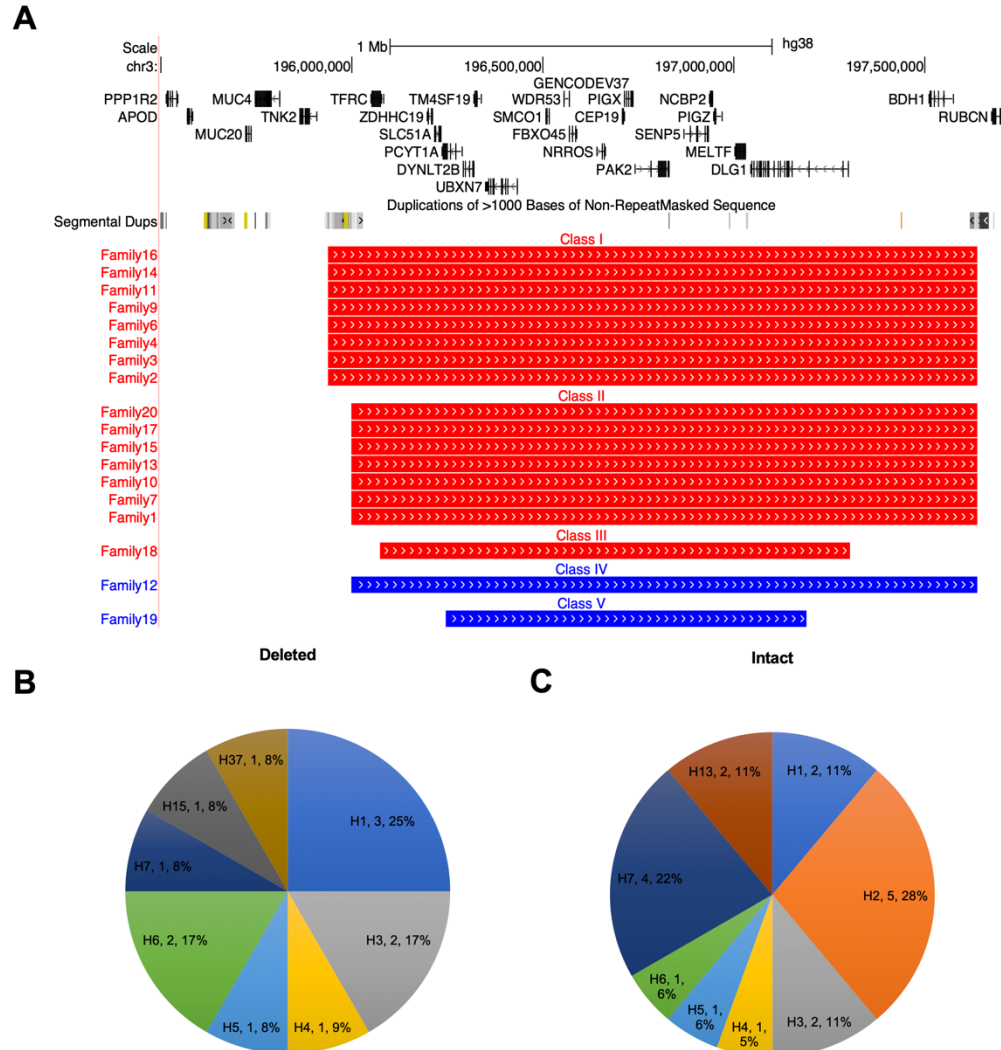

381  
 382 **Figure 4: 3q29 Deletions and duplications reported among the studied probands.** (A) Genes and duplications of > 1000 Bases  
 383 of Non-Repeat Masked Sequence represented as Tracks overlapping the 3q29 region (top). Red lines represent deletion, and blue  
 384 lines duplication cases analyzed in this study (bottom). (B) Distribution of the 3q29 haplotypes observed in deleted chromosomes in  
 385 probands. (C) Distribution of the 3q29 haplotypes observed in intact chromosomes in probands. The order in the labels in pie charts  
 386 represents haplotype IDs, count, and prevalence.  
 387

388 To investigate whether certain haplotypes predispose to the 3q29 deletion or duplication  
 389 syndrome, we characterized the 3q29 region, determined the haplotype in probands (Figure 4B-  
 390 C) and available parents, and finally determined which chromosomes were inherited by the  
 391 probands. For ten probands, DNA from both biological parents was available (Table S7). For  
 392 two probands, DNA from only one parent was available (Table S7). For four probands, DNA  
 393 was not available from either of the parents (Table S7). When possible, we determined on which  
 394 inherited haplotype the deletion occurred, and which chromosome was inherited in an intact



395 state for each proband. Interestingly, we identified a novel haplotype, H37, in one father (Family  
396 18), who was the parent of origin of the deletion observed in the proband (Figure S9). However,  
397 we did not observe an enrichment of 3q29 deletions or duplications with any particular  
398 haplotype.

399

#### 400 ***Defining five breakpoint classes for the 3q29 deletion and duplication syndromes***

401 While it has been known that breakpoints for 3q29 deletions and duplications generally  
402 occur within two SD blocks (SDB and SDC), the breakpoints have not been precisely mapped.  
403 Among the 16 probands with the 3q29 deletions, we identified three deletion classes (Table S8).  
404 The Class I deletion breakpoints (~1.69 Mbp, 195.94-197.64 Mbp; GRCh38) were observed in  
405 eight probands, with the proximal breakpoint localized to the first ~5 kbp segment (blue, Figure  
406 5A) in SDB, and the distal to a ~5 kbp paralogous copy in SDC (blue, Figure 5A). Although  
407 optical mapping data indicated that the deletion breakpoints localized to the ~5 kbp segments,  
408 the possibility of breakpoint localization to the ~15 kbp segments (magenta, partial copies of  
409 SDA-26 kbp segment) in SDB and SDC cannot be excluded. The optical mapping resolution in  
410 this ~15 kbp was insufficient (only one label resides within ~26 kbp segment and zero labels in  
411 the ~15 kbp segment, which is a partial copy of ~26 kbp segment), therefore sequence-level  
412 resolution is required to determine whether paralogous copies of ~5 kbp or ~15 kbp cause  
413 NAHR in deletions classified as Class I. The Class II deletions (~1.63 Mbp, 195.99-197.64 Mbp;  
414 GRCh38) were observed in seven probands and had the proximal breakpoint localized to the  
415 second ~5 kbp segment in SDB and the distal breakpoint localized to the same ~5 kbp segment  
416 in SDC (Figure 5B). The Class III deletion (~1.23 Mbp, 196.01-197.3 Mbp; GRCh38) was  
417 observed in only one proband, and the proximal and distal breakpoints did not overlap with any  
418 SDs (Figure 5C). Sequence analysis of the ~5 kbp segments in SDB and SDC in the GRCh38  
419 reference genome showed a high sequence identity to each other ( $\geq 98\%$ ) suggesting that  
420 these paralogous copies can facilitate NAHR-mediated 3q29 deletions and duplications (Figure

421 5D-G, Table S7). On the other hand, the proximal and distal deletion breakpoints in Class III  
422 were not localized to SDs, sequence similarity was not detected between breakpoints which  
423 suggests that a mechanism other than NAHR has caused this deletion.

424

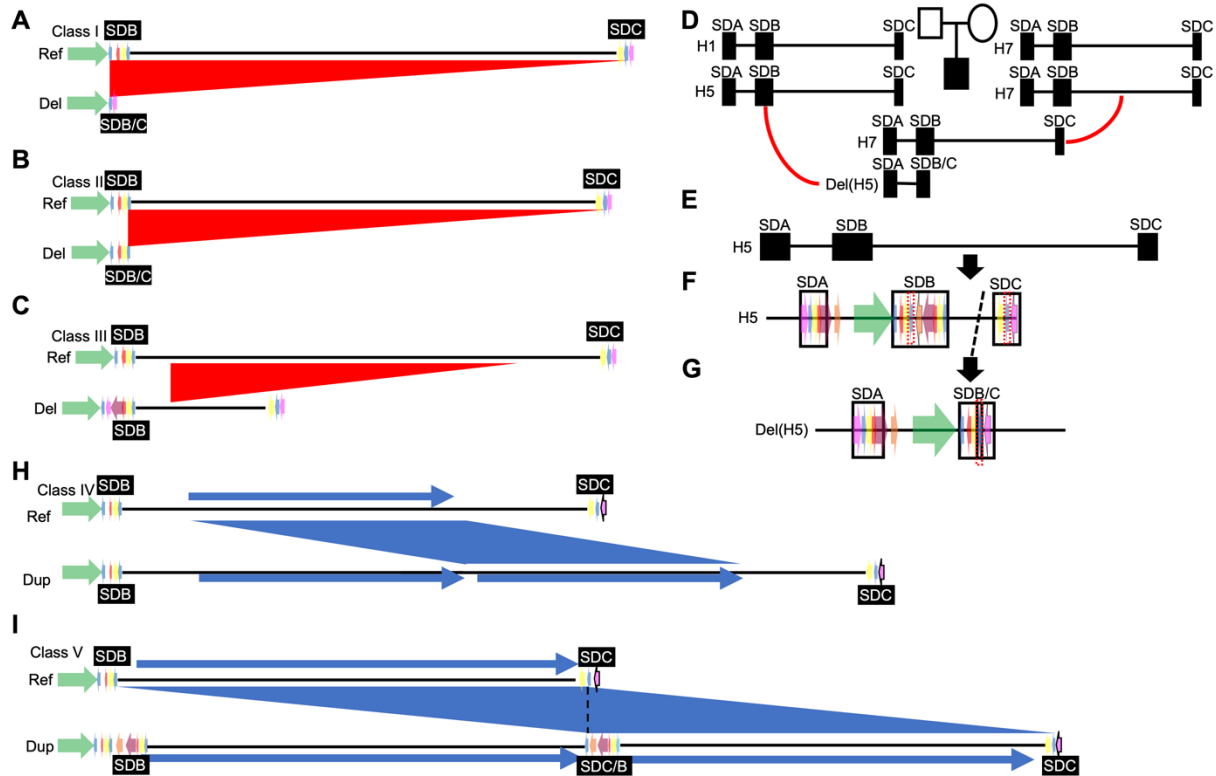

425

426 **Figure 5: Deletion and duplication breakpoint classes identified in our study and depiction of NAHR-mediated deletion in**  
427 **Family 7 trio from the 3q29 Project.** (A-C) Schematic representation of 3q29 deletion breakpoint classes. The red triangles  
428 represent the deletion in each class. (D) Pedigree of Family 7, black rectangles with vertical dark lines represent genomes of the  
429 father, mother, and proband, red curved lines show the parent of origin and the transmitting parent, and black rectangles represent  
430 the 3q29 SDs. (E) Father's parent of origin chromosome, haplotype H5. (F) The 3q29 SDs, SDA-B-C, and the proposed NAHR  
431 mechanism. (G) Deleted chromosome occurring as a result of NAHR. Red dashed boxes indicate the proposed segments to  
432 mediate NAHR and result in 3q29 deletion in the proband. (H-I) Duplication breakpoint classes from Families 12 and 19,  
433 respectively. Black dotted line represents the duplication breakpoint. Blue rectangle: duplicated 3q29 region with the blue shaded  
434 area representing the duplication.

435

436 Additionally, we analyzed two probands with duplications, ranging in size from ~942 kbp  
437 (~196.25-197.2 Mbp; GRCh38) to ~1.6 Mbp (~196-197.6 Mbp; GRCh38). We categorized these  
438 duplications as Class IV and Class V, respectively (Figure 5H-I). In Class IV, the proximal and  
439 distal breakpoints localized to a unique region between SDB and SDC (Figure 5H) suggesting  
440 that a mechanism other than NAHR has caused the duplication. The Class V duplication  
441 appears to be a reciprocal duplication of the recurrent ~1.6 Mbp 3q29 Class II deletion (Figure

442 5I). The proximal breakpoint in Class V localized to the second ~5 kbp segment (blue) in SDB  
443 and the distal breakpoint localized to the paralogous ~5 kbp segment (blue) in SDC (Figure 5I).  
444 Therefore, this duplication was likely caused by NAHR.

445 Finally, we investigated 3q29 haplotypes and phenotypes to evaluate whether there was  
446 a correlation between haplotypes and phenotypes of 3q29 deletion and duplication probands,  
447 however, no significant associations were identified (Table S9).

448

## 449 Discussion

450 The 3q29 deletion and duplication syndromes are rare genomic disorders. In the  
451 recurrent 3q29 deletion and duplication cases, breakpoints occur within two SD blocks which  
452 themselves are comprised of different SDs with > 98% sequence identity prone to NAHR<sup>11,41,42</sup>.  
453 Since these SD blocks have a complex structure containing paralogous copies of SDs with high  
454 sequence identity, it is often difficult to accurately identify where the breakpoints occurred.  
455 Techniques such as short-read sequencing have limited ability to resolve the breakpoint  
456 locations within repetitive genomic segments such as SDs, due to the high sequence identity  
457 and lengths of the paralogous copies<sup>43</sup>. With the availability of complementary genomic  
458 technologies, including long-read sequencing and optical mapping, we are now able to  
459 interrogate these regions and to identify breakpoint locations more precisely<sup>34,35</sup>.

460 In this study, we first *de novo* assembled the 3q29 region in 161 unaffected individuals  
461 from the 1000GP and CIAPM cohorts to identify distinct haplotypes. Ebert and colleagues<sup>33</sup>  
462 previously reported 18 haplotypes in 30 unaffected individuals from the 1000GP. We have now  
463 identified an additional 18 novel haplotypes in unaffected individuals using optical mapping  
464 technology bringing the total number of known haplotypes for this region to 36. Six haplotypes  
465 are either population-specific or have low frequency in other populations. For instance, the H8  
466 haplotype was enriched in 11% of the AFR population, the H5 haplotype was enriched in 41% of  
467 the EAS population, the H6 haplotype was enriched in 19% of the EUR population, and the H1  
468 haplotype was enriched in 26% of the SAS population. In summary, we have conducted the  
469 largest and most detailed investigation of 3q29 haplotypes in 161 unaffected individuals from 26  
470 worldwide populations to date and report significant differences in haplotype frequencies  
471 between the studied populations. Furthermore, the 3q29 haplotypes contain inversions and  
472 copy number changes of 3q29 segments which overlap with protein-coding genes,  
473 pseudogenes, and non-coding RNAs, such as *MUC20* and *MUC4*, lncRNA *MUC20-OT1*,  
474 *SDHAP1*, *SDHAP2*, *SMBD1P*, and miRNAs. A recent study showed that lncRNA *SDHAP1*

475 upregulated the expression of *EIF4G2* by reducing miR-4465 levels in ovarian cancer cells <sup>44</sup>  
476 which suggests that the pseudogenes may regulate gene expression through microRNAs <sup>45</sup>.  
477 Therefore, additional copies of the pseudogenes may impact patients' phenotypes by regulating  
478 the protein-coding genes in the 3q29 region. However, further studies need to be conducted to  
479 investigate the function of the pseudogenes in the etiology of 3q29 deletion and duplication  
480 syndromes.

481 We analyzed the 3q29 haplotype structures in 16 probands with 3q29 deletion syndrome  
482 to determine the breakpoint locations more precisely in probands and available parents, and to  
483 identify the molecular mechanisms responsible for the deletions. In 15 of 16 probands, the  
484 deletion breakpoints overlapped paralogous copies of ~5 kbp SD segments (blue) within SDB  
485 and SDC, located in the same orientation. High sequence identity (> 98%) between the ~5 kbp  
486 segments (blue) suggests that an NAHR mechanism caused the deletions in these probands,  
487 consistent with previous findings <sup>11</sup>. However, in Class I, the possibility of breakpoint localization  
488 to the ~15 kbp segments (magenta, partial copies of SDA-26 kbp segment) in SDB and SDC  
489 cannot be excluded since these segments are adjacent (in the distal region) to the ~5 kbp  
490 segment (blue). The sequence-level resolution is required to overcome the optical mapping  
491 resolution insufficiency at the ~15 kbp segment and to determine whether paralogous copies of  
492 ~5 kbp or ~15 kbp cause NAHR in deletions classified as Class I. The deletion breakpoints in  
493 Class II were localized to the paralogous copies of ~5 kbp segments and the deletion  
494 breakpoints for one proband, Class III, did not occur within any SD blocks in the region  
495 suggesting that non-homologous end joining (NHEJ) or replication-based mechanism might be  
496 responsible <sup>46</sup>. We also analyzed two individuals with the 3q29 duplication syndrome. One  
497 individual carried the common recurrent ~1.6 Mbp duplication that appears to be the reciprocal  
498 duplication of the recurrent ~1.6 Mbp 3q29 deletion, whereas the other ~1.2 Mbp 3q29 deletion  
499 was not recurrent. Based on the deletion and duplication breakpoints, we have defined three  
500 deletion and two duplication breakpoint classes for the 3q29 Project patient cohort.

501 Inversions have previously been hypothesized to be a risk factor for some *de novo*  
502 deletions and duplications<sup>47</sup>. It is thought that inversions can interfere with synapsis during  
503 meiosis, potentially causing DNA loops that are susceptible to misalignment and/or breakage<sup>2</sup>.  
504 For example, at the Williams-Beuren syndrome locus, there is an enrichment of inversions in the  
505 parents where the *de novo* deletion arises<sup>48,49</sup>. However, in 2003, a group studying the 22q11.2  
506 deletion syndrome showed that none of the parents of 18 probands with the 22q11.2 deletion  
507 syndrome carried an inversion in this region<sup>50</sup>. Two inversions, ~289 kbp, and ~2 Mbp, have  
508 previously been reported at the 3q29 locus<sup>38-40</sup>. The breakpoints in these inversions were  
509 localized to inversely oriented paralogous copies of 3q29 segments between SDA and SDB,  
510 and SDA and SDC, which could mediate NAHR. Among the 22 parents analyzed in the current  
511 study, six were found to carry the ~289 kbp inversion, and three were inherited (H2: n=2, H13:  
512 n=1) by the proband in an intact state. None of the parents carried the larger ~2 Mbp inversion  
513 occurring between SDA and SDC. While the sample size is relatively small, our data provide no  
514 evidence for an inversion predisposing to deletion or duplication at the 3q29 locus.

515 One limitation of our study is the lack of resolution of deletion and duplication  
516 breakpoints at the sequence level. Nevertheless, with optical mapping, we refined the deletion  
517 and duplication breakpoints to ~5 kbp segments. Other technologies, such as long reads from  
518 Oxford Nanopore Technology (ONT) or Pacific Biosciences (PacBio) may be able to provide  
519 nucleotide resolution breakpoints for these deletions and duplications. Unfortunately, the  
520 available DNA samples from the 3q29 Project are not appropriate for ONT or PacBio High  
521 Fidelity (HiFi) long-read sequencing since these require large amounts of high molecular weight  
522 DNA.

523 In summary, we have identified a total of 19 novel haplotypes in the 3q29 region of the human  
524 genome, some of which were shown to have significant enrichment in certain populations. We  
525 have further shown that the majority of patients with the 3q29 deletion or duplication syndromes  
526 have breakpoints within a ~5 kbp (blue) SD segment but find no evidence of inversions or other

527 SVs to act as predisposing factors. Haplotypes identified in both 3q29 patients and unaffected  
528 individuals will be a valuable resource for future 3q29 deletion and duplication studies both to  
529 help to identify the breakpoints more precisely and whether certain 3q29 haplotypes predispose  
530 or protect from 3q29 deletion or duplication syndrome.

531



532 **Supplemental Data**

533 Figure S1: HPRC optical mapping and phased assembly 3q29 haplotype comparison – Part 1.

534 Figure S2: HPRC optical mapping and phased assembly 3q29 haplotype comparison – Part 2.

535 Figure S3: HPRC optical mapping and phased assembly 3q29 haplotype comparison – Part 3.

536 Figure S4: HPRC optical mapping and phased assembly 3q29 haplotype comparison – Part 4.

537 Figure S5: HPRC HG01928 bionano optical mapping and phased assembly 3q29 haplotype  
538 comparison.

539 Figure S6: The smallest 3q29 haplotype, H28 (~287 kbp), and the largest 3q29 haplotype, H24  
540 (~859 kbp), comparison.

541 Figure S7: Inversion Frequencies: Inversions identified in this study; INV-1 and INV-2, and 289  
542 kbp inversion.

543 Figure S8: Large Inversions identified in this study; INV-1 and INV-2.

544 Figure S9: Novel haplotype H38 identified in one of the parents of origins (Father, Family 18)  
545 from the 3q29 Project.

546 Table S1: 1000 Genomes Project and California Initiative to Advance Precision Medicine  
547 Sample Cohort Optical Mapping Statistics

548 Table S2: The Emory 3q29 Project Sample Cohort Optical Mapping Statistics

549 Table S3: The 3q29 Segments

550 Table S4: Segment Sequence Identity

551 Table S5: 1000 Genomes Project and California Initiative to Advance Precision Medicine  
552 Sample Cohort Haplotypes

553 Table S6: DGV Overlap

554 Table S7: The Emory 3q29 Project Sample Cohort Haplotypes

555 Table S8: Breakpoint classes identified in the 3q29 Project probands with the 3q29 deletion or  
556 duplication syndrome

557 Table S9: The Emory 3q29 Project Proband Breakpoint Classes and Phenotype Comparison

558

559 **Declaration of Interests**

560 The authors declare no competing interests.

561

562 **Acknowledgments**

563 The authors are grateful to the participants and their families, without whose support this work  
564 would not have been possible. In addition, we thank the Human Genome Structural Variation  
565 Consortium and the Human Pangenome Reference Consortium for making their datasets  
566 available. We thank Dr. Pille Hallast, Dr. Jee Young Kwon, and Dr. Kwondo Kim for providing  
567 valuable feedback in editing this manuscript and Dr. Joshy George for assistance in statistical  
568 analyses, and The Jackson Laboratory High-Performance Computing admins for providing an  
569 environment to perform all computational analyses. J.G.M. conceived the study and analysis  
570 using Bionano optical mapping. F.Y. and U.G. performed the analysis and interpretation. J.G.M.  
571 obtained informed consent from parents and patients during hospital follow-up and facilitated  
572 collection of blood samples. J.G.M. coordinated study and subject enrollment. J.G.M. and T.M.  
573 carried out sample processing and experimentation. F.Y., and U.G drafted, and F.Y., C.L. and  
574 J.G.M. critically revised the article. Final approval of the version to be published was given by  
575 F.Y., U.G., T.M, Y.M., T.H.S, M.E.Z., P-Y.K., C.L. and J.G.M.

576

577 **Funding**

578 C.L. was supported by the National Institute of Health (NIH) U24HG007497 and The First  
579 Affiliated Hospital of Xi'an Jiaotong University. T.H.S. and P-Y.K. were supported by grant #  
580 GM120772, from the National Institute of General Medical Sciences of the National Institutes of  
581 Health (NIH). Human Pangenome Reference Consortium support comes from NHGRI: A  
582 Human Genome Reference Center (HGRC; [RFA-HG-19-004](#)), High-Quality Human Reference  
583 Genomes (HGRQ; [RFA-HG-19-002](#)), Genome Reference Representations (GRR; [RFA-HG-19-](#)

584 [003](#)), and Technology development for complete sequencing of genomes ([NOT-HG-19-011](#)).

585 JGM was supported by R01 MH110701.

586

#### 587 **Web resources**

588 SV Genotyping: <https://github.com/yuliamostovoy/OMGenSV>

589 Bionano Solve 3.5.1: <https://bionanogenomics.com/support/software-downloads/>

590 OMTTools: <https://github.com/TF-Chan-Lab/OMTools>

591 The Human Genome Structural Variation Consortium dataset:

592 [http://ftp.1000genomes.ebi.ac.uk/vol1/ftp/data\\_collections/HGSVC2/working/20200117\\_Bionano](http://ftp.1000genomes.ebi.ac.uk/vol1/ftp/data_collections/HGSVC2/working/20200117_Bionano_optical_maps/)  
593 [\\_optical\\_maps/](#)

594 University of California San Francisco dataset: Bionano bnx files of 114 samples (including 52

595 1000GP samples and 65 CIAPM samples) were available under the following accession number

596 PRJNA588278 in the NCBI BioProject database.

597 The Human Pangenome Reference Consortium dataset: [https://github.com/human-](https://github.com/human-pangenomics/HPP_Year1_Data_Freeze_v1.0)

598 [pangenomics/HPP\\_Year1\\_Data\\_Freeze\\_v1.0](#)

599

#### 600 **Data and code availability**

601 The 3q29 Project dataset: The data supporting the findings of this study are available upon

602 request from the authors.

603 HGSVC samples molecule support: 10.6084/m9.figshare.16899313

604 UCSF samples molecule support: 10.6084/m9.figshare.16886500

605

## 606 References

- 607 1. Finucane, B.M., Ledbetter, D.H., and Vorstman, J.A. (2021). Diagnostic genetic testing for  
608 neurodevelopmental psychiatric disorders: closing the gap between recommendation and  
609 clinical implementation. *Curr. Opin. Genet. Dev.* 68, 1–8.
- 610 2. Lee, J.A., and Lupski, J.R. (2006). Genomic rearrangements and gene copy-number  
611 alterations as a cause of nervous system disorders. *Neuron* 52, 103–121.
- 612 3. Harel, T., and Lupski, J.R. (2018). Genomic disorders 20 years on—mechanisms for clinical  
613 manifestations. *Clin. Genet.* 93, 439–449.
- 614 4. Osborne, L.R., Martindale, D., Scherer, S.W., Shi, X.-M., Huizenga, J., Heng, H.H.Q., Costa,  
615 T., Pober, B., Lew, L., Brinkman, J., et al. (1996). Identification of Genes from a 500-kb Region  
616 at 7q11.23 That Is Commonly Deleted in Williams Syndrome Patients. *Genomics* 36, 328–336.
- 617 5. Pober, B.R. (2010). Williams–Beuren Syndrome. *N. Engl. J. Med.* 362, 239–252.
- 618 6. McDonald-McGinn, D.M., Sullivan, K.E., Marino, B., Philip, N., Swillen, A., Vorstman, J.A.S.,  
619 Zackai, E.H., Emanuel, B.S., Vermeesch, J.R., Morrow, B.E., et al. (2015). 22q11.2 deletion  
620 syndrome. *Nat Rev Dis Primers* 1, 15071.
- 621 7. Willatt, L., Cox, J., Barber, J., Cabanas, E.D., Collins, A., Donnai, D., FitzPatrick, D.R.,  
622 Maher, E., Martin, H., Parnau, J., et al. (2005). 3q29 microdeletion syndrome: clinical and  
623 molecular characterization of a new syndrome. *Am. J. Hum. Genet.* 77, 154–160.
- 624 8. Ballif, B.C., Hornor, S.A., Jenkins, E., Madan-Khetarpal, S., Surti, U., Jackson, K.E.,  
625 Asamoah, A., Brock, P.L., Gowans, G.C., Conway, R.L., et al. (2007). Discovery of a previously  
626 unrecognized microdeletion syndrome of 16p11.2–p12.2. *Nat. Genet.* 39, 1071–1073.
- 627 9. Shinawi, M., Liu, P., Kang, S.-H.L., Shen, J., Belmont, J.W., Scott, D.A., Probst, F.J.,  
628 Craigen, W.J., Graham, B.H., Pursley, A., et al. (2010). Recurrent reciprocal 16p11.2  
629 rearrangements associated with global developmental delay, behavioural problems,  
630 dysmorphism, epilepsy, and abnormal head size. *J. Med. Genet.* 47, 332–341.
- 631 10. Rossi, E., Piccini, F., Zollino, M., Neri, G., Caselli, D., Tenconi, R., Castellan, C., Carrozzo,  
632 R., Danesino, C., Zuffardi, O., et al. (2001). Cryptic telomeric rearrangements in subjects with  
633 mental retardation associated with dysmorphism and congenital malformations. *J. Med. Genet.*  
634 38, 417–420.
- 635 11. Ballif, B.C., Theisen, A., Coppinger, J., Gowans, G.C., Hersh, J.H., Madan-Khetarpal, S.,  
636 Schmidt, K.R., Tervo, R., Escobar, L.F., Friedrich, C.A., et al. (2008). Expanding the clinical  
637 phenotype of the 3q29 microdeletion syndrome and characterization of the reciprocal  
638 microduplication. *Mol. Cytogenet.* 1, 8.
- 639 12. Glassford, M.R., Rosenfeld, J.A., Freedman, A.A., Zwick, M.E., Mulle, J.G., and Unique  
640 Rare Chromosome Disorder Support Group (2016). Novel features of 3q29 deletion syndrome:  
641 Results from the 3q29 registry. *American Journal of Medical Genetics Part A* 170, 999–1006.
- 642 13. Russo, R.S., Gambello, M.J., Murphy, M.M., Aberizk, K., Black, E., Lindsey Burrell, T.,  
643 Carlock, G., Cubells, J.F., Epstein, M.T., Espana, R., et al. (2021). Deep phenotyping in 3q29  
644 deletion syndrome: recommendations for clinical care. *Genet. Med.* 1–9.

- 645 14. Pollak, R.M., Zinsmeister, M.C., Murphy, M.M., Zwick, M.E., Emory 3q29 Project, and Mulle,  
646 J.G. (2020). New phenotypes associated with 3q29 duplication syndrome: Results from the  
647 3q29 registry. *Am. J. Med. Genet. A* 182, 1152–1166.
- 648 15. Blanquer, F.A., Aleixandre Blanquer, F., Manchón Trives, I., Forniés Arnau, M.J., Alcaraz  
649 Mas, L.A., Picó Alfonso, N., and Galán Sánchez, F. (2011). Síndrome de microduplicación  
650 3q29. *Anales de Pediatría* 75, 409–412.
- 651 16. Fernández-Jaén, A., Castellanos, M. del C., Fernández-Perrone, A.L., Fernández-  
652 Mayoralas, D.M., de la Vega, A.G., Calleja-Pérez, B., Fernández, E.C., Albert, J., and Hombre,  
653 M.C.S. (2014). Cerebral palsy, epilepsy, and severe intellectual disability in a patient with 3q29  
654 microduplication syndrome. *Am. J. Med. Genet. A* 164A, 2043–2047.
- 655 17. Goobie, S., Knijnenburg, J., Fitzpatrick, D., Sharkey, F.H., Lionel, A.C., Marshall, C.R.,  
656 Azam, T., Shago, M., Chong, K., Mendoza-Londono, R., et al. (2008). Molecular and clinical  
657 characterization of de novo and familial cases with microduplication 3q29: guidelines for copy  
658 number variation case reporting. *Cytogenet. Genome Res.* 123, 65–78.
- 659 18. Kessi, M., Peng, J., Yang, L., Duan, H., Tang, Y., and Yin, F. (2018). A Case With 4 de  
660 Novo Copy Number Variations With Clinical Features That Overlap 1q43q44 Microdeletion and  
661 3q29 Microduplication Syndromes. *Child Neurol Open* 5, 2329048X18798200.
- 662 19. Lisi, E.C., Hamosh, A., Doheny, K.F., Squibb, E., Jackson, B., Galczynski, R., Thomas,  
663 G.H., and Batista, D.A.S. (2008). 3q29 interstitial microduplication: A new syndrome in a three-  
664 generation family. *American Journal of Medical Genetics Part A* 146A, 601–609.
- 665 20. Lesca, G., Rudolf, G., Labalme, A., Hirsch, E., Arzimanoglou, A., Genton, P., Motte, J., de  
666 Saint Martin, A., Valenti, M.-P., Boulay, C., et al. (2012). Epileptic encephalopathies of the  
667 Landau-Kleffner and continuous spike and waves during slow-wave sleep types: genomic  
668 dissection makes the link with autism. *Epilepsia* 53, 1526–1538.
- 669 21. Schilter, K.F., Reis, L.M., Schneider, A., Bardakjian, T.M., Abdul-Rahman, O., Kozel, B.A.,  
670 Zimmerman, H.H., Broeckel, U., and Semina, E.V. (2013). Whole-genome copy number  
671 variation analysis in anophthalmia and microphthalmia. *Clinical Genetics* 84, 473–481.
- 672 22. Tassano, E., Uccella, S., Giacomini, T., Severino, M., Siri, L., Gherzi, M., Celle, M.E., Porta,  
673 S., Gimelli, G., and Ronchetto, P. (2018). 3q29 microduplication syndrome: Description of two  
674 new cases and delineation of the minimal critical region. *Eur. J. Med. Genet.* 61, 428–433.
- 675 23. Vitale, A., Labruna, G., Mancini, A., Alfieri, A., Iaffaldano, L., Nardelli, C., Pasanisi, F.,  
676 Pastore, L., Buono, P., and Lombardo, B. (2018). 3q29 microduplication in a small family with  
677 complex metabolic phenotype from Southern Italy. *Clin. Chem. Lab. Med.* 56, e167–e170.
- 678 24. Stefansson, H., Meyer-Lindenberg, A., Steinberg, S., Magnusdottir, B., Morgen, K.,  
679 Arnarsdottir, S., Bjornsdottir, G., Walters, G.B., Jonsdottir, G.A., Doyle, O.M., et al. (2014).  
680 CNVs conferring risk of autism or schizophrenia affect cognition in controls. *Nature* 505, 361–  
681 366.
- 682 25. Cox, D.M., and Butler, M.G. (2015). A clinical case report and literature review of the 3q29  
683 microdeletion syndrome. *Clin. Dysmorphol.* 24, 89–94.
- 684 26. Uddin, M., Sturge, M., Peddle, L., O’Rielly, D.D., and Rahman, P. (2011). Genome-wide

- 685 signatures of “rearrangement hotspots” within segmental duplications in humans. *PLoS One* 6,  
686 e28853.
- 687 27. Lam, E.T., Hastie, A., Lin, C., Ehrlich, D., Das, S.K., Austin, M.D., Deshpande, P., Cao, H.,  
688 Nagarajan, N., Xiao, M., et al. (2012). Genome mapping on nanochannel arrays for structural  
689 variation analysis and sequence assembly. *Nat. Biotechnol.* 30, 771–776.
- 690 28. Levy-Sakin, M., Pastor, S., Mostovoy, Y., Li, L., Leung, A.K.Y., McCaffrey, J., Young, E.,  
691 Lam, E.T., Hastie, A.R., Wong, K.H.Y., et al. (2019). Genome maps across 26 human  
692 populations reveal population-specific patterns of structural variation. *Nat. Commun.* 10, 1025.
- 693 29. Wong, K.H.Y., Ma, W., Wei, C.-Y., Yeh, E.-C., Lin, W.-J., Wang, E.H.F., Su, J.-P., Hsieh, F.-  
694 J., Kao, H.-J., Chen, H.-H., et al. (2020). Towards a reference genome that captures global  
695 genetic diversity. *Nat. Commun.* 11, 5482.
- 696 30. Murphy, M.M., Lindsey Burrell, T., Cubells, J.F., España, R.A., Gambello, M.J., Goines,  
697 K.C.B., Klaiman, C., Li, L., Novacek, D.M., Papetti, A., et al. (2018). Study protocol for The  
698 Emory 3q29 Project: evaluation of neurodevelopmental, psychiatric, and medical symptoms in  
699 3q29 deletion syndrome. *BMC Psychiatry* 18, 183.
- 700 31. Mosley, T.J., Johnston, H.R., Cutler, D.J., Zwick, M.E., and Mulle, J.G. (2021). Sex-specific  
701 recombination patterns predict parent of origin for recurrent genomic disorders. *BMC Med.*  
702 *Genomics* 14, 154.
- 703 32. Cao, H., Hastie, A.R., Cao, D., Lam, E.T., Sun, Y., Huang, H., Liu, X., Lin, L., Andrews, W.,  
704 Chan, S., et al. (2014). Rapid detection of structural variation in a human genome using  
705 nanochannel-based genome mapping technology. *Gigascience* 3, 34.
- 706 33. Ebert, P., Audano, P.A., Zhu, Q., Rodriguez-Martin, B., Porubsky, D., Bonder, M.J.,  
707 Sulovari, A., Ebler, J., Zhou, W., Serra Mari, R., et al. (2021). Haplotype-resolved diverse  
708 human genomes and integrated analysis of structural variation. *Science* 372,.
- 709 34. Demaerel, W., Mostovoy, Y., Yilmaz, F., Vervoort, L., Pastor, S., Hestand, M.S., Swillen, A.,  
710 Vergaelen, E., Geiger, E.A., Coughlin, C.R., et al. (2019). The 22q11 low copy repeats are  
711 characterized by unprecedented size and structural variability. *Genome Res.* 29, 1389–1401.
- 712 35. Mostovoy, Y., Yilmaz, F., Chow, S.K., Chu, C., Lin, C., Geiger, E.A., Meeks, N.J.L.,  
713 Chatfield, K.C., Coughlin, C.R., Surti, U., et al. (2021). Genomic regions associated with  
714 microdeletion/microduplication syndromes exhibit extreme diversity of structural variation.  
715 *Genetics* 217,.
- 716 36. Leung, A.K.-Y., Jin, N., Yip, K.Y., and Chan, T.-F. (2017). OMTTools: a software package for  
717 visualizing and processing optical mapping data. *Bioinformatics* 33, 2933–2935.
- 718 37. Nurk, S., Koren, S., Rhie, A., Rautiainen, M., Bzikadze, A.V., Mikheenko, A., Vollger, M.R.,  
719 Altemose, N., Uralsky, L., Gershman, A., et al. (2021). The complete sequence of a human  
720 genome.
- 721 38. Alsmadi, O., John, S.E., Thareja, G., Hebbar, P., Antony, D., Behbehani, K., and Thanaraj,  
722 T.A. (2014). Genome at Juncture of Early Human Migration: A Systematic Analysis of Two  
723 Whole Genomes and Thirteen Exomes from Kuwaiti Population Subgroup of Inferred Saudi  
724 Arabian Tribe Ancestry. *PLoS ONE* 9, e99069.



- 725 39. Thareja, G., John, S.E., Hebbar, P., Behbehani, K., Thanaraj, T.A., and Alsmadi, O. (2015).  
726 Sequence and analysis of a whole genome from Kuwaiti population subgroup of Persian  
727 ancestry. *BMC Genomics* 16, 92.
- 728 40. Antonacci, F., Kidd, J.M., Marques-Bonet, T., Ventura, M., Siswara, P., Jiang, Z., and  
729 Eichler, E.E. (2009). Characterization of six human disease-associated inversion  
730 polymorphisms. *Hum. Mol. Genet.* 18, 2555–2566.
- 731 41. Rudd, M.K., Keene, J., Bunke, B., Kaminsky, E.B., Adam, M.P., Mulle, J.G., Ledbetter, D.H.,  
732 and Martin, C.L. (2009). Segmental duplications mediate novel, clinically relevant chromosome  
733 rearrangements. *Hum. Mol. Genet.* 18, 2957–2962.
- 734 42. Mulle, J.G., Dodd, A.F., McGrath, J.A., Wolyniec, P.S., Mitchell, A.A., Shetty, A.C., Sobreira,  
735 N.L., Valle, D., Rudd, M.K., Satten, G., et al. (2010). Microdeletions of 3q29 confer high risk for  
736 schizophrenia. *Am. J. Hum. Genet.* 87, 229–236.
- 737 43. Treangen, T.J., and Salzberg, S.L. (2011). Repetitive DNA and next-generation sequencing:  
738 computational challenges and solutions. *Nat. Rev. Genet.* 13, 36–46.
- 739 44. Zhao, H., Wang, A., and Zhang, Z. (2020). LncRNA SDHAP1 confers paclitaxel resistance  
740 of ovarian cancer by regulating EIF4G2 expression via miR-4465. *J. Biochem.* 168, 171–181.
- 741 45. Hu, X., Yang, L., and Mo, Y.-Y. (2018). Role of Pseudogenes in Tumorigenesis. *Cancers*  
742 10,.
- 743 46. Carvalho, C.M.B., and Lupski, J.R. (2016). Mechanisms underlying structural variant  
744 formation in genomic disorders. *Nat. Rev. Genet.* 17, 224–238.
- 745 47. Feuk, L. (2010). Inversion variants in the human genome: role in disease and genome  
746 architecture. *Genome Med.* 2, 11.
- 747 48. Bayés, M., Magano, L.F., Rivera, N., Flores, R., and A. Pérez Jurado, L. (2003). Mutational  
748 Mechanisms of Williams-Beuren Syndrome Deletions. *Am. J. Hum. Genet.* 73, 131–151.
- 749 49. Osborne, L.R., Li, M., Pober, B., Chitayat, D., Bodurtha, J., Mandel, A., Costa, T., Grebe, T.,  
750 Cox, S., Tsui, L.-C., et al. (2001). A 1.5 million–base pair inversion polymorphism in families  
751 with Williams-Beuren syndrome. *Nat. Genet.* 29, 321–325.
- 752
- 753 50. Gebhardt, G.S., Devriendt, K., Thoelen, R., Swillen, A., Pijkels, E., Gewillig, M., Fryns, J.-P.,  
754 and Vermeesch, J.R. (2003). No evidence for a parental inversion polymorphism predisposing  
755 to rearrangements at 22q11.2 in the DiGeorge/Velocardiofacial syndrome. *European Journal of*  
756 *Human Genetics* 11, 109–111.

757

758



## 759 Supplemental Data

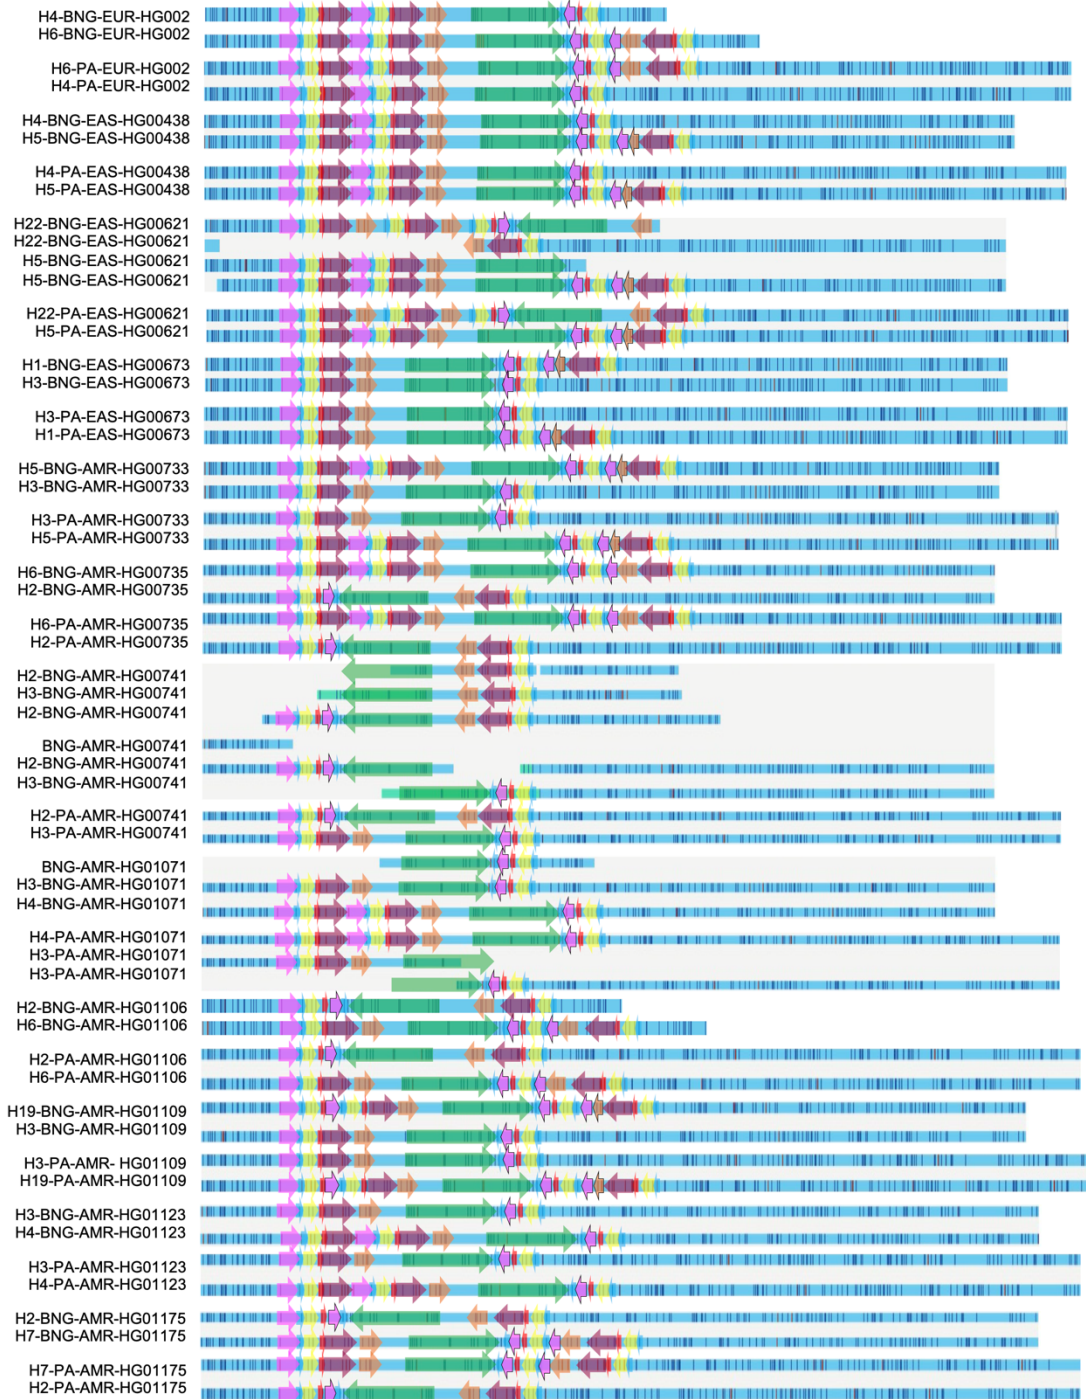

760  
761  
762  
763

**Figure S1: HPRC optical mapping and phased assembly 3q29 haplotype comparison – Part 1.** EUR: European ancestry, EAS: East Asian ancestry, AMR: American ancestry, BNG: Bionano Genomics optical mapping data, PA: Phased assembly in silico mapping data, colored arrows depicting the 3q29 segments.

It is made available under a [CC-BY-NC-ND 4.0 International license](https://creativecommons.org/licenses/by-nc-nd/4.0/) .

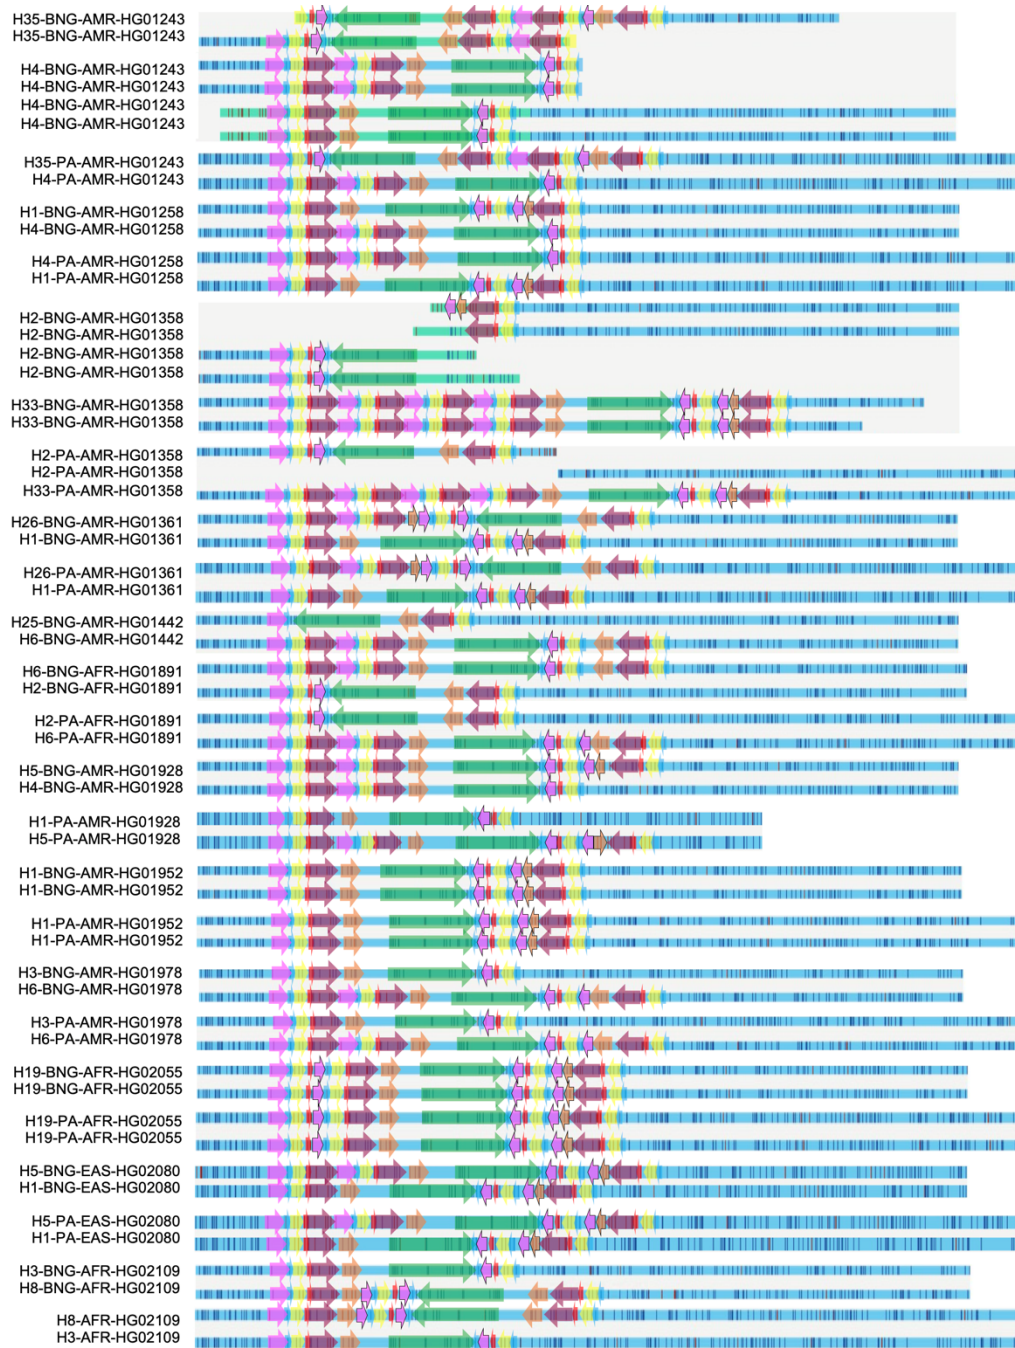

764  
765  
766  
767

**Figure S2: HPRC optical mapping and phased assembly 3q29 haplotype comparison – Part 2.** AMR: American ancestry, EAS: East Asian ancestry, AFR: African ancestry, BNG: Bionano Genomics optical mapping data, PA: Phased assembly in silico mapping data, colored arrows depicting the 3q29 segments.



It is made available under a [CC-BY-NC-ND 4.0 International license](https://creativecommons.org/licenses/by-nc-nd/4.0/).

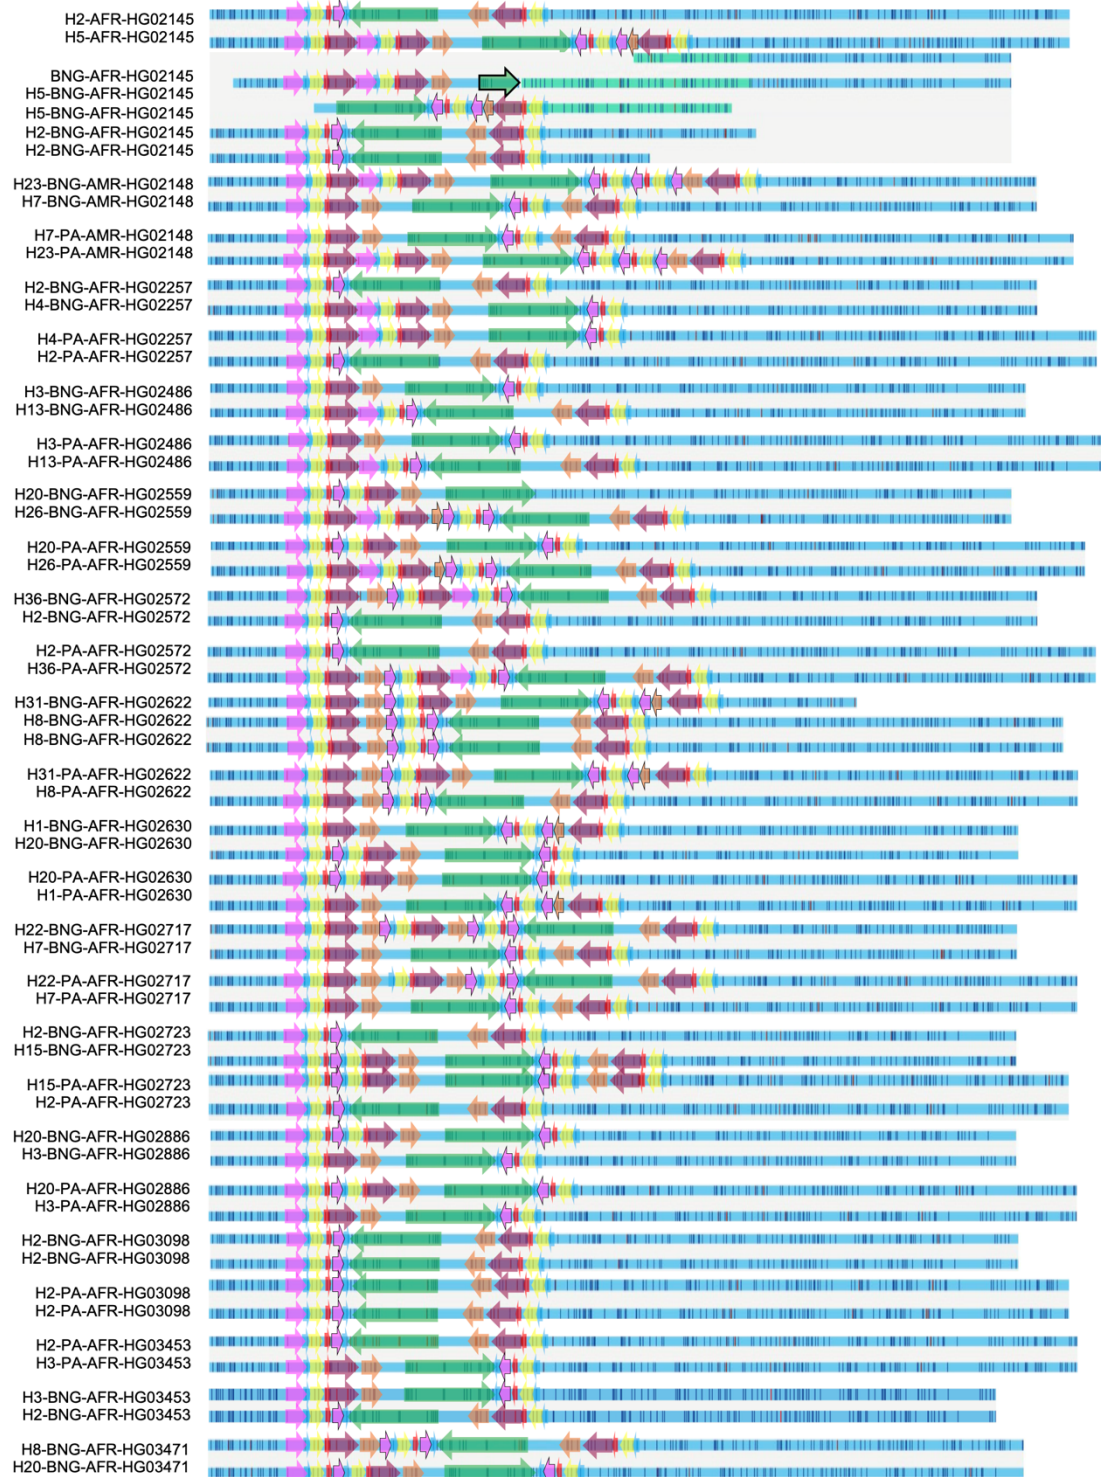

768  
769  
770  
771

**Figure S3: HPRC optical mapping and phased assembly 3q29 haplotype comparison – Part 3.** AFR: African ancestry, AMR: American ancestry, BNG: Bionano Genomics optical mapping data, PA: Phased assembly in silico mapping data, colored arrows depicting the 3q29 segments.

It is made available under a [CC-BY-NC-ND 4.0 International license](https://creativecommons.org/licenses/by-nc-nd/4.0/) .

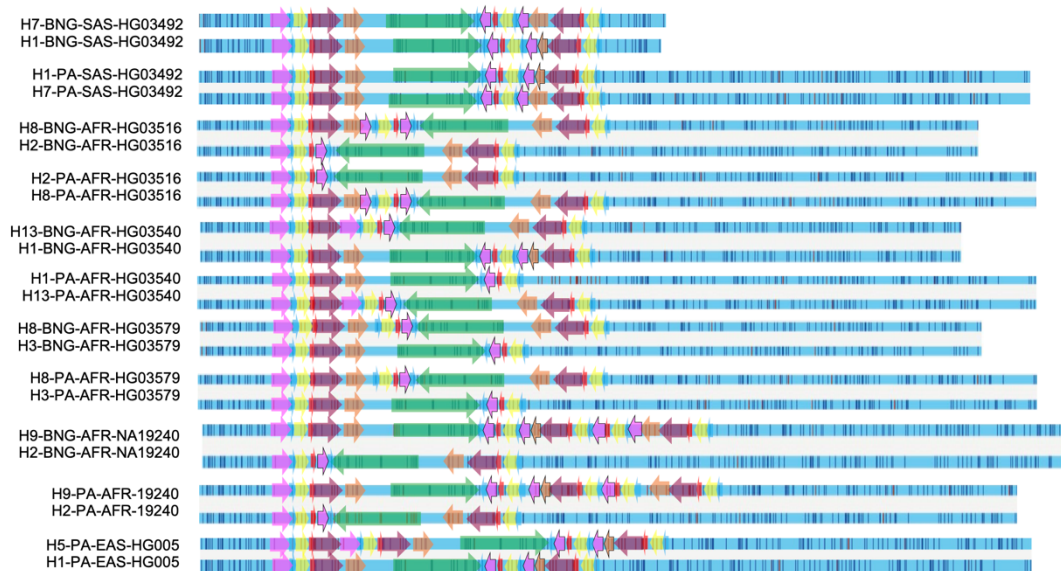

772  
773 **Figure S4: HPRC optical mapping and phased assembly 3q29 haplotype comparison – Part 3.** AFR: African ancestry, AMR:  
774 American ancestry, BNG: Bionano Genomics optical mapping data, PA: Phased assembly in silico mapping data, colored arrows  
775 depicting the 3q29 segments.

776

It is made available under a [CC-BY-NC-ND 4.0 International license](https://creativecommons.org/licenses/by-nc-nd/4.0/) .

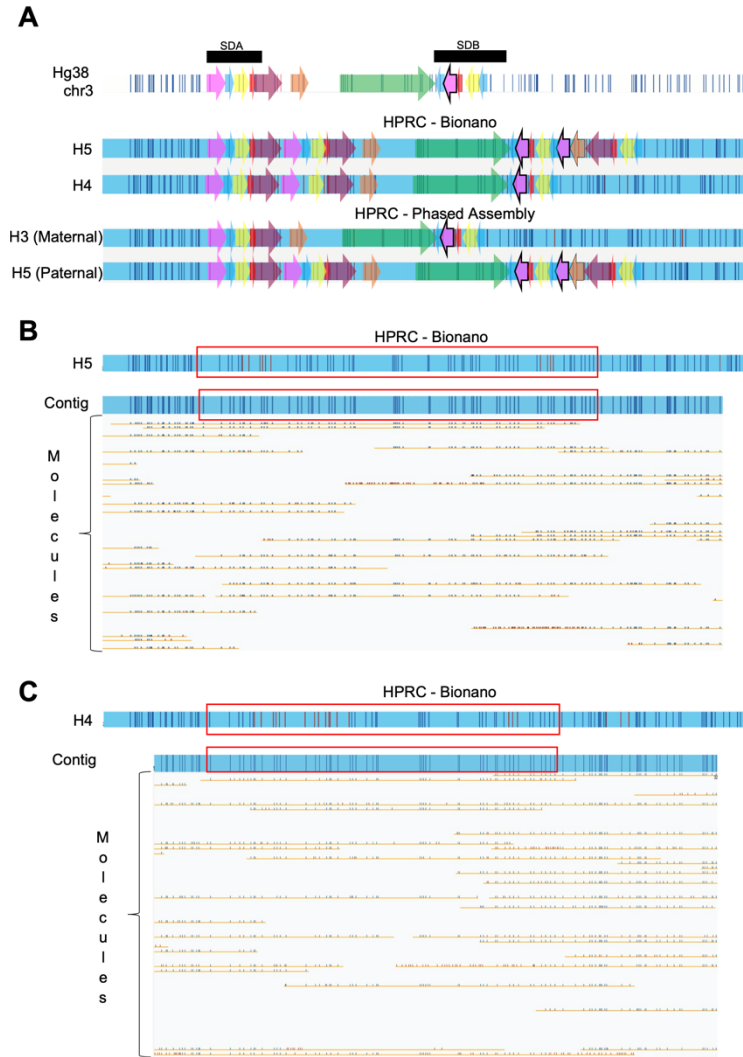

777  
778 **Figure S5: HPRC HG01928 bionano optical mapping and phased assembly 3q29 haplotype comparison.** A – Hg38/GRCh38  
779 *in silico* map represented at the top, optical mapping haplotypes, H5 and H4 respectively, represented in the middle, and phased  
780 assembly maternal and paternal haplotypes are represented at the bottom. B - Optical mapping of the H5 haplotype contigs  
781 represented in blue and optical mapping molecules represented as yellow lines showing single molecule support for the H5  
782 haplotype. C - Optical mapping of the H4 haplotype contigs represented in blue and optical mapping molecules represented as  
783 yellow lines showing single molecule support for the H4 haplotype. The red boxes in B and C shows the 3q29 region in each  
784 haplotype.

785  
786

It is made available under a [CC-BY-NC-ND 4.0 International license](https://creativecommons.org/licenses/by-nc-nd/4.0/) .

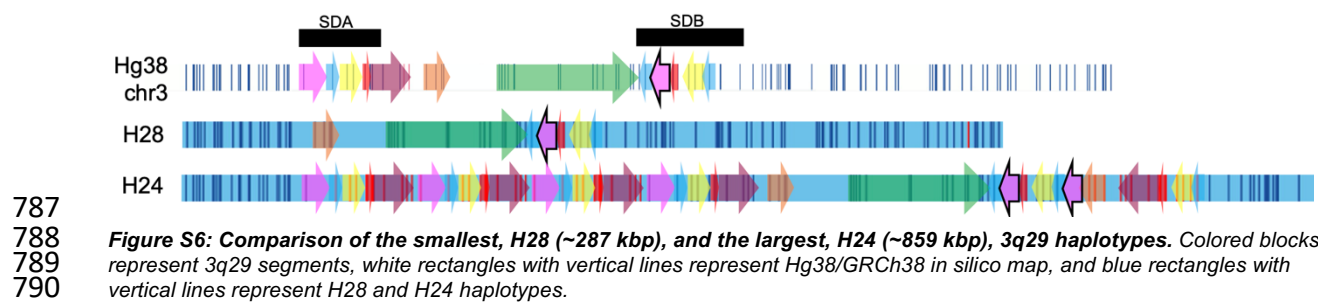

It is made available under a [CC-BY-NC-ND 4.0 International license](https://creativecommons.org/licenses/by-nc-nd/4.0/).

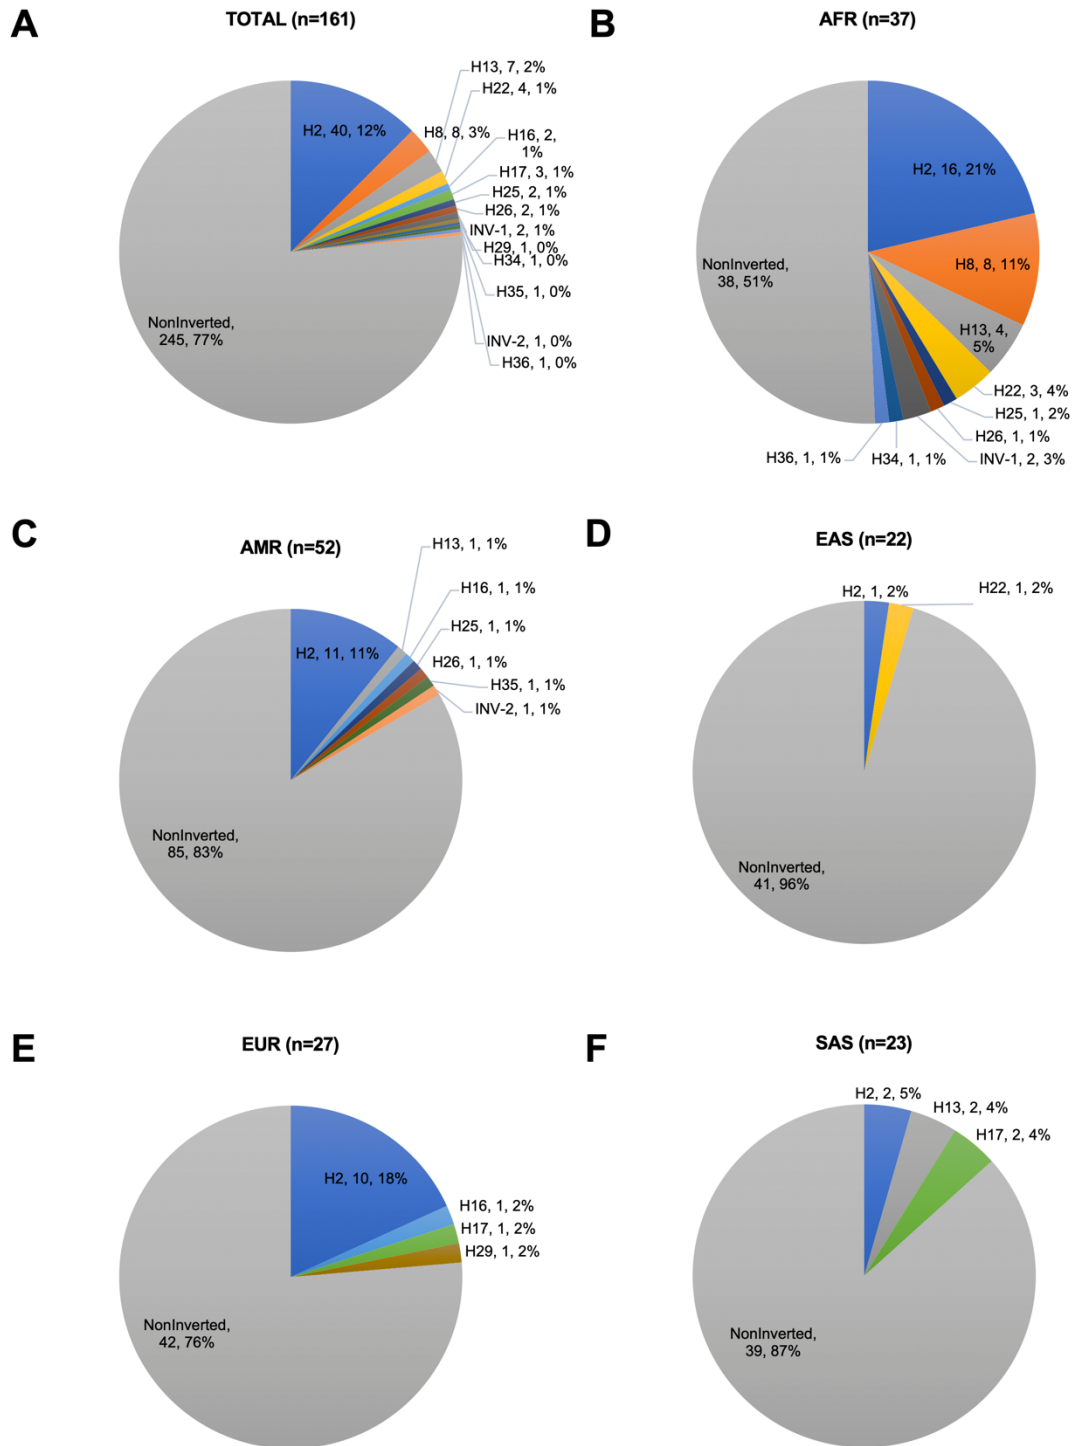

791  
 792 **Figure S7: Inversion Frequencies: Inversions identified in this study; INV-1 and INV-2, and 289 kbp inversion.** A - The  
 793 proportion of inversion haplotypes among all studied samples, B - The proportion of inversion haplotypes in AFR population, C - The  
 794 proportion of inversion haplotypes in AMR population, D - The proportion of inversion haplotypes in EAS population, E - The  
 795 proportion of inversion haplotypes in EUR population, F - The proportion of inversion haplotypes in SAS population. Proportions  
 796 were represented as: Haplotype ID/Count/Percentage.

797



It is made available under a [CC-BY-NC-ND 4.0 International license](https://creativecommons.org/licenses/by-nc-nd/4.0/).

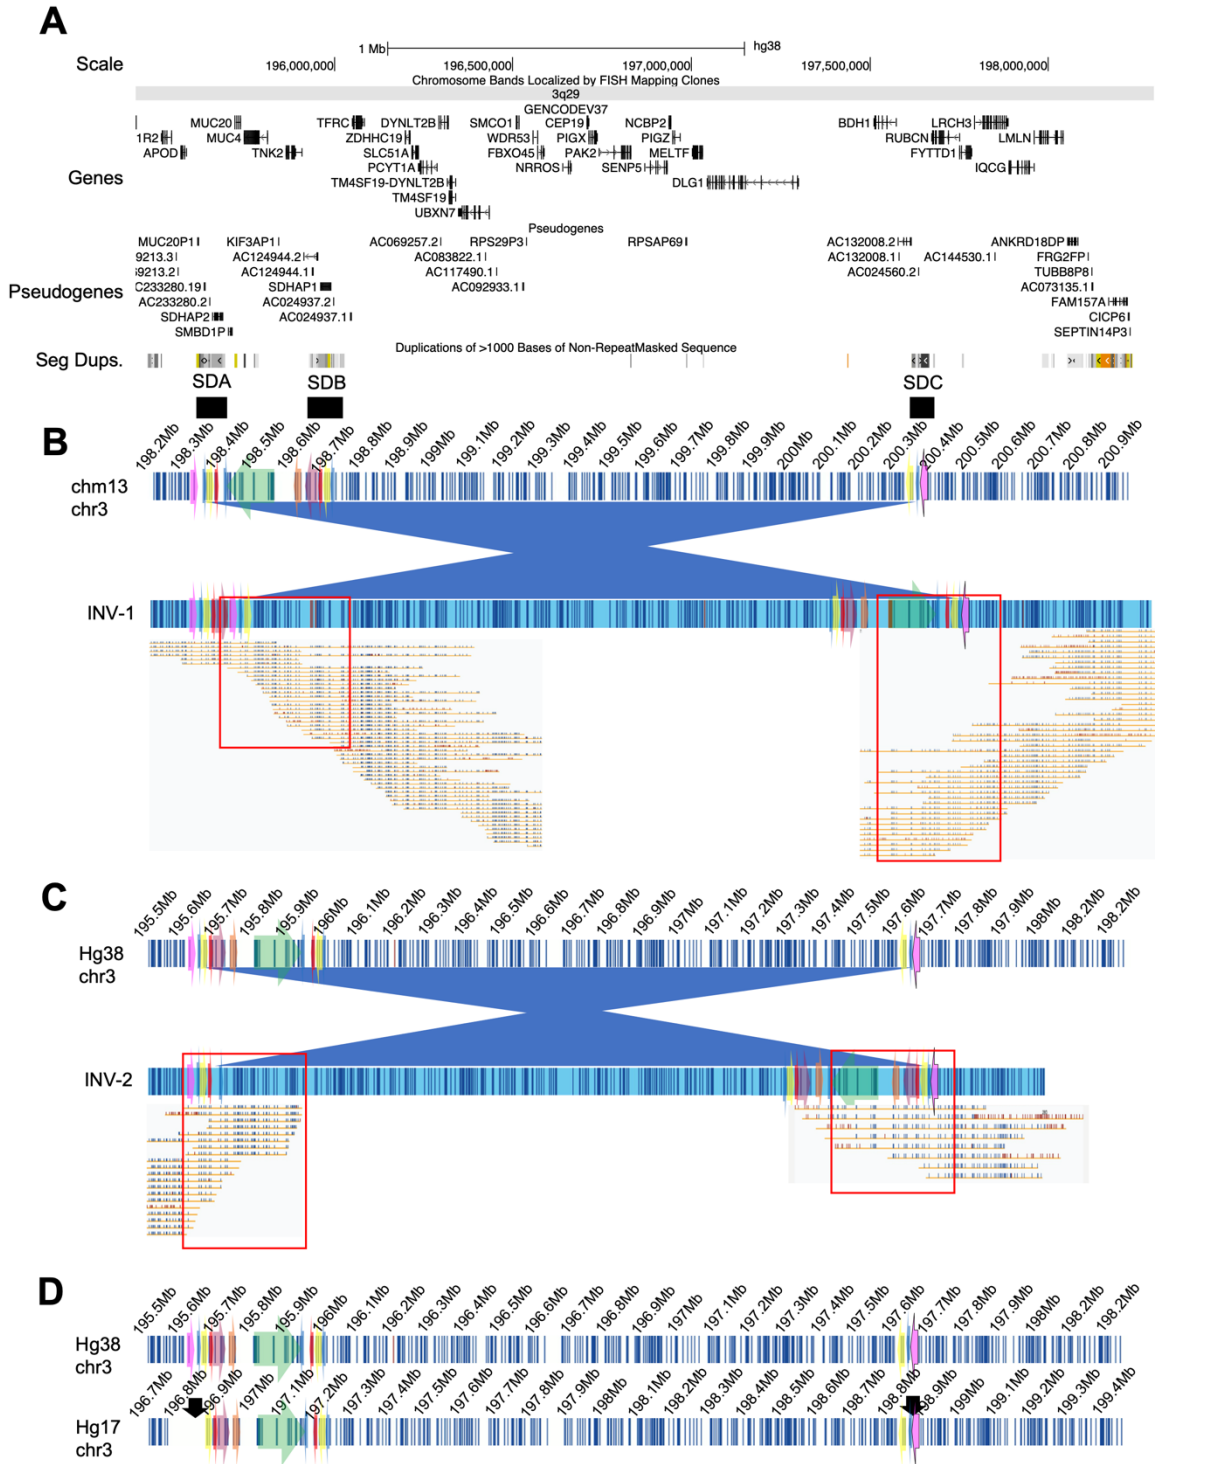

798  
 799  
 800  
 801  
 802  
 803  
 804  
 805  
 806  
 807

**Figure S8: Large inversions identified in this study; INV-1 (~2.03 Mbp) and INV-2 (~2.13 Mbp).** A - UCSC Genome Browser Genes, Pseudogenes, and segmental duplication tracks are represented. B - Upper rectangle with white background and vertical lines represents chm13/T2T (Telomere-to-Telomere) in silico map of the 3q29 region. The rectangle at the bottom represents the structure of INV-1. Red rectangle: highlighting the molecules supporting the inversion breakpoints. C - Upper rectangle with white background and vertical lines represents GRCh38/hg38 in silico map of the 3q29 region. The rectangle at the bottom represents the structure of INV-2. Red rectangle: highlighting the molecules supporting the inversion breakpoints. D - GRCh38/hg38 and NCBI35/hg17 reference assemblies represented with white backgrounds and vertical blue lines. Black arrows in NCBI35/hg17 indicate inversion breakpoints identified previously by Antonacci and colleagues in 2009. Colored arrows in each panel represent 3q29 segments.



808

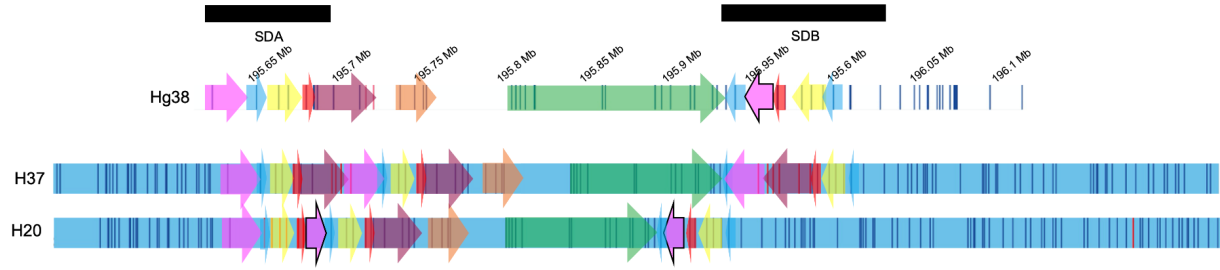

809

810

811

812

**Figure S9: Novel haplotype H37 identified in one of the parents of origin (Father, Family 18) from the 3q29 Project.** Optical mapping contigs in blue rectangles with vertical dark lines. Colored arrows represent the 3q29 segments in each haplotype.
